# Supplementary material for: Characterization of a Novel Phage ΦAb1656-2 and Its Endolysin with Higher Antimicrobial Activity against Multidrug-Resistant Acinetobacter baumannii
Source: MDPI journal article supplement (doi:10.3390/v13091848), 2021-09-16
Supplement: s1 [file s1]

Supplementary Figure 1.

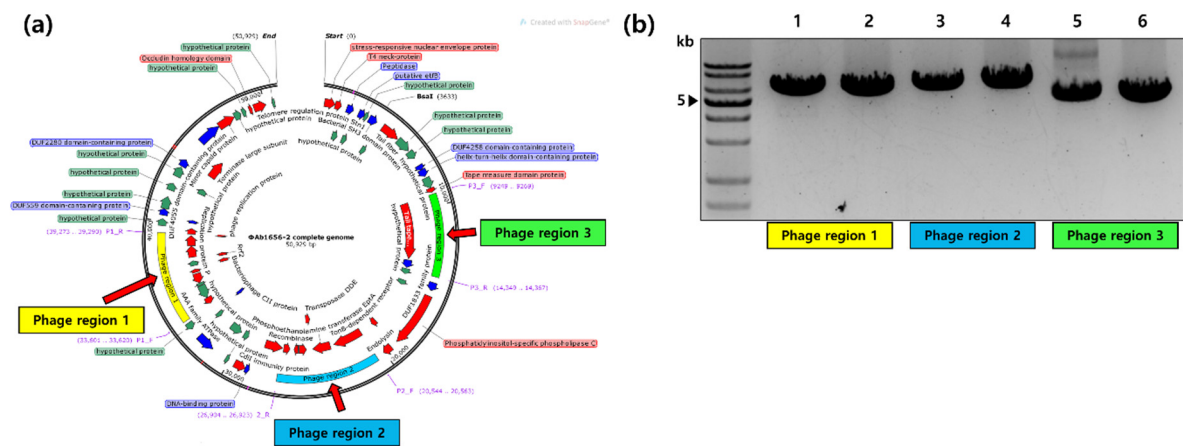

**Figure S1.** Identification of ΦAb1656-2 genome from ΦAb1656-2 and *A. baumannii* 1656-2 by PCR. (a) Location of phage regions in the whole phage sequence. (b) The phage regions was amplified using *A. baumannii* 1656-2 chromosomal DNA as templates in lane 1, 3, 5 and ΦAb1656-2 genomic DNA as templates in lane 2, 4, 6. The PCR amplicon size of phage regions are 6.4 kb, 6.4 kb and 5.1 kb, respectively.

Supplementary Figure 2.

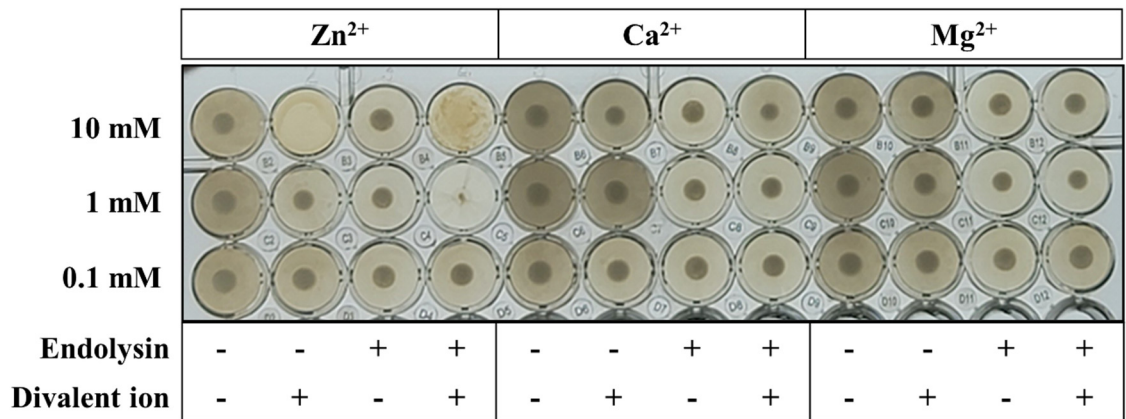

**Figure S2.** Effects of divalent cation ions on the antibacterial activity of AbEndolysin. The concentration of AbEndolysin was fixed, and the divalent ions Zn<sup>2+</sup>, Ca<sup>2+</sup>, and Mg<sup>2+</sup> were used at concentrations of 0.1 mM, 1 mM, and 10 mM, respectively. Total volume of each well was fixed as 200 µl with fresh MHB.

### Supplementary Figure 3.

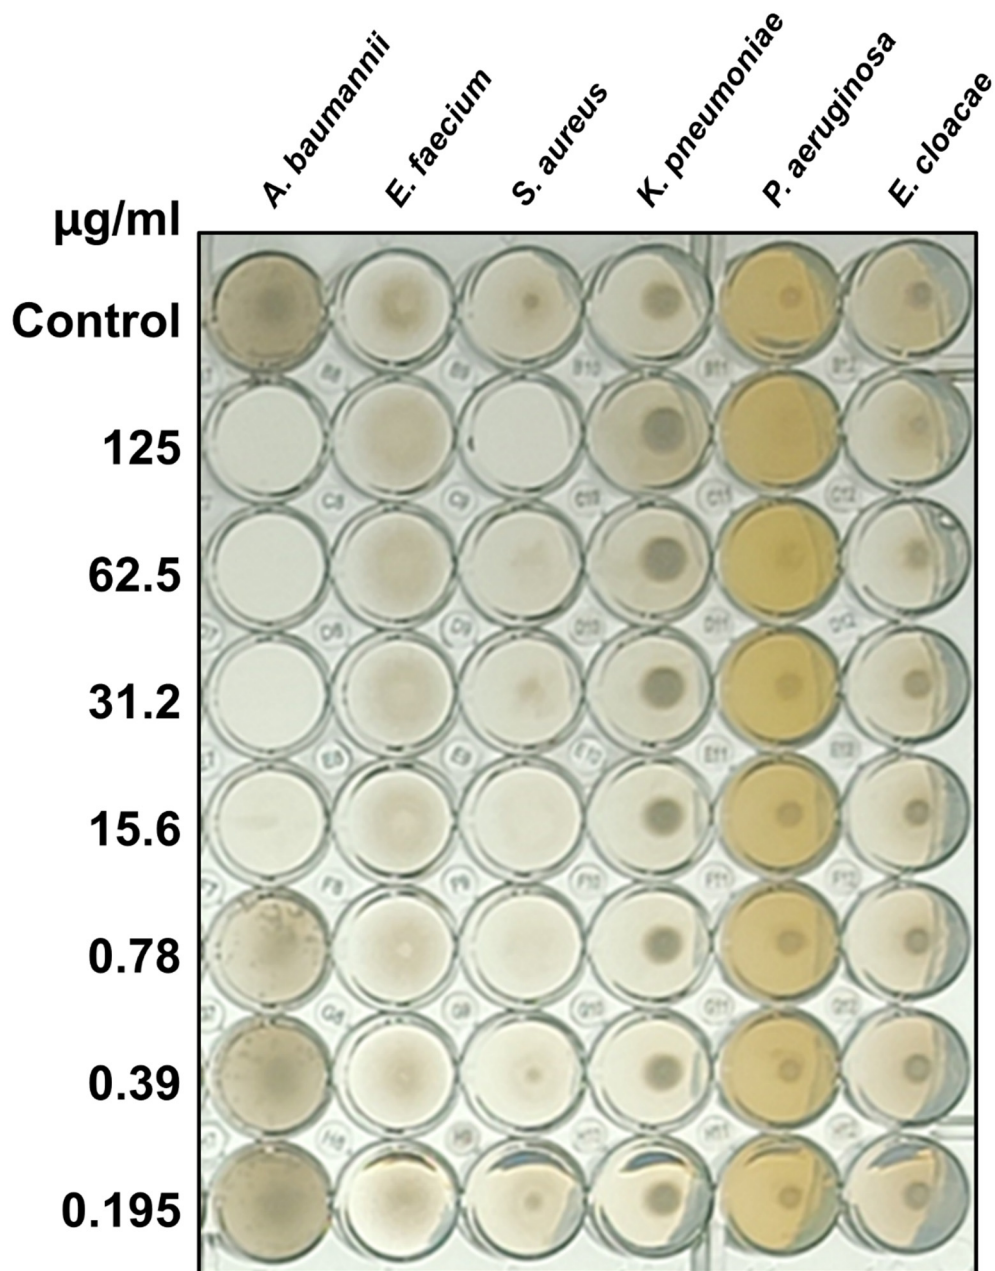

**Figure S3.** Antibacterial activity test of AbEndolysin against ESKAPE pathogens. AbEndolysin antibacterial activity against ESKAPE pathogens (*Enterococcus faecium* (clinical strain), *Staphylococcus aureus* ATCC 33591, *Klebsiella pneumoniae* ATCC 13883, *A. baumannii* ATCC 17978, *Pseudomonas aeruginosa* ATCC 27853 and *Enterobacter cloacae* (clinical strain)). AbEndolysin was serially diluted two-fold from the highest concentration of 125 µg/ml to confirm its inhibitory concentration. Fresh bacterial culture in MHB was used as control.

Supplementary Figure 4.

(a)

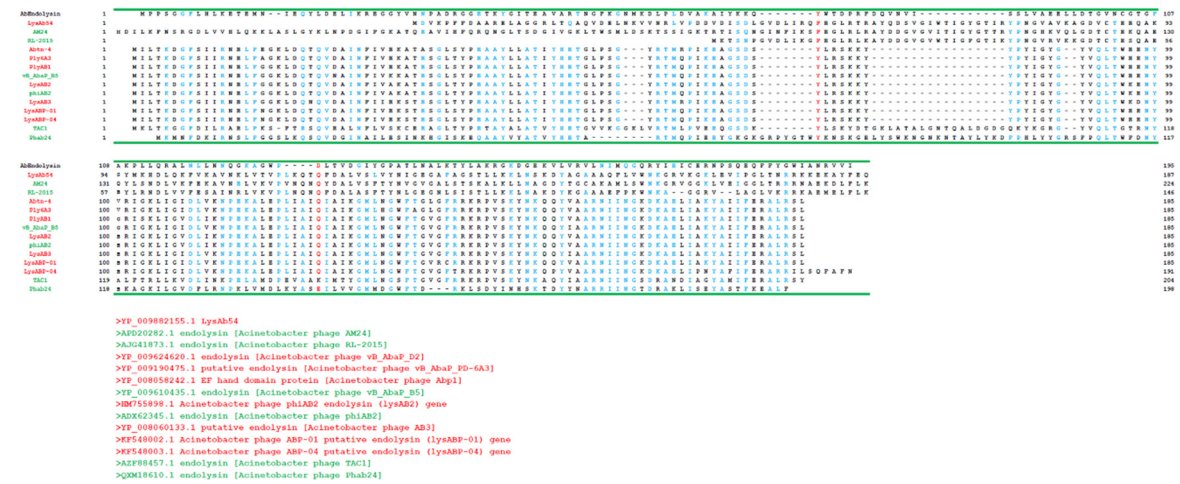

(b)

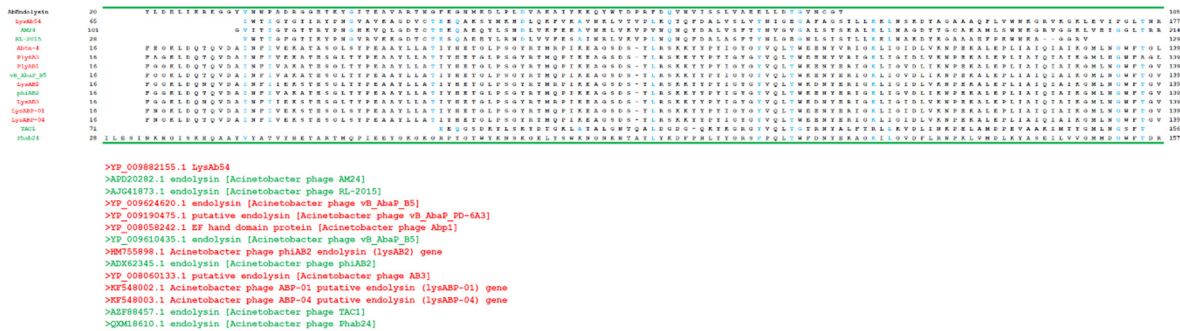

**Figure S4.** Multiple sequence alignment of AbEndolysin with another *Acinetobacter* phage derived endolysin. Thirteen *Acinetobacter* phage derived endolysins amino acid sequence was compared. Red letters (Abtn-4, ply6A3, plyAB1, LysAB2, LysAB3, LysABP-01 and LysABP-04) indicate reported endolysins and green letters (vB\_AbP\_B5, phiAB2, TAC1, Phab24, AM24 and RL-2015) indicate endolysins sequence obtained from the NCBI protein database.

Table S1: list for the genome predicted 68 putative ORFs

| Protein ID     | Start | End   | Strand | Product                                                     | Protein Seq                                                                                                                                                                                                                                                                                                   |
|----------------|-------|-------|--------|-------------------------------------------------------------|---------------------------------------------------------------------------------------------------------------------------------------------------------------------------------------------------------------------------------------------------------------------------------------------------------------|
| phageDNA_00001 | 182   | 857   | +      | stress-responsive nuclear envelope protein                  | MKIYTRIAAAALETGIANPOYYENLNKAKEVIYNGPQKDYESLEVVRKLEVPQKTLTATVWVAVGTPPELQAVMDAKAECEKVEENTQKQKALEAGNGSELSSENSRLKDAVLADKALDAEAYVGIKTEFAFNIDPAMQARIAEEKAENPA                                                                                                                                                       |
| phageDNA_00002 | 862   | 1251  | +      | T4 neck-protein                                             | MSFTVDDANSLSGDFAPDSQKARLVKLANWMMNRGFPVDPIDPLKDAACEIKGLKAVYNGEQQLKRWKYVADSVSEKFEQDQSEAISSFQIAIDFISLQDKDPNASNFGGIPLYRA*                                                                                                                                                                                         |
| phageDNA_00003 | 1208  | 1621  | +      | hypothetical protein                                        | MQVLMALAYHFTGIDMKLRDEIQADAEAFNDLADAHHTTCERISKTNDWPKTEYVEKENYSGRGVLFQSYQSYEQITGLVLTOKKATVQNEVTMPKDEWLTALGSFRVWQDQFNTWKCQLRV*                                                                                                                                                                                   |
| phageDNA_00004 | 1600  | 2034  | +      | hypothetical protein                                        | MSASKSVGAKMWPQYVPSVYVSPFHQVYTLANQLDHMLFEDMKADQFLMDGADAVSTSTSDGAVYQIGDTAKCRQVYGLLLHEAVHWQKRIKMGREPSSEFEAYSQIAAQDLFMYEESVNDQMEGEKAN*                                                                                                                                                                            |
| phageDNA_00005 | 2006  | 2374  | +      | hypothetical protein                                        | MGWKGKQPTFEVDSKAAEDQVQHVMDYQSLNVPDVTQYGRASHVHVGSGADFQGREPTENPDAAQAKIKKGLNVYONNKAYGPRLENGWSDQAPQDGLTFTNFSQYGG*                                                                                                                                                                                                 |
| phageDNA_00006 | 2382  | 2774  | +      | putative Electron transfer flavoprotein subunit beta (etfB) | MTLEQTRADQIORMSFGTGAEQRIQRPAPDPTVPTKQVWCLRTIAGGSFTTSGIADKPCPTRRTGNMOCDFRHLTGEXAVTVSDALLHFEYTHIELCLNGSGIYAKGADQIQVNVSGIVGW*                                                                                                                                                                                    |
| phageDNA_00007 | 2778  | 2994  | +      | hypothetical protein                                        | MSCMLTEEEIKROELERHEDMSVELSKWDSENKLCVSDNIRLNAVSLGPKHNVVTQVSDLDNEL*                                                                                                                                                                                                                                             |
| phageDNA_00008 | 3103  | 3624  | +      | bacterial SH3 domain protein                                | MKISTLWGAGLQALVGFQSDNDSPKQTSDSNAQSAVEEVESKYNTNLRNPKQNVQVGLGRGEKVDIEMKGMWARSILNSSPQWLSTKLCTEDGQFQKSRSTTSNNYQALSHPHISERQKQKTYVSDSCSAVDYQVPRGQHYCTSGGNKRYKPRV*                                                                                                                                                   |
| phageDNA_00009 | 3721  | 4074  | +      | hypothetical protein                                        | MSNVFKRSDTFNLQLQVOMDEALQVPDDVRADLTGYTFTSQKALADGATVATLCTLSSQSTQKGLWLNKSSASTATWPLGLCOMDKAVVSGTQHTETLTFTQVDSVTA*                                                                                                                                                                                                 |
| phageDNA_00010 | 4074  | 5252  | +      | putative tail fiber                                         | MANLVKFSWDHRRFPYNASQKQRPVFAAGINPLAPNFQVGTAAISQSGGTGATTAAAGARLANAAGSNGDSIELKGLTPLSSQGLGADNAQTARINLGLTAALAASTTSQYDPTGRALRGQDWGGAIGSRSMDVAPLNGFRITDITLNTOTGNSIGPYGFLICTTBSIKGLTNGSRFGLGAAQYALKYTRNSGTSTWNNPMLTANQITDQGGFQKASFPVLTGSFELHNDWAKQITPDKLTKSGLGSGDWYEVKQAKNGNTVWVSTVSTLEHLSKTYKRFQVEXAAVQLEENLQPSGRVGR |
| phageDNA_00011 | 5305  | 6222  | +      | hypothetical protein                                        | MSGAKRLYACEEAVLGTTPANPVVYTYRRYVDSLTENTTETDSSEVDSPFRQGAIVTEAVYTGDLFELELGTDLVLNLAFNWAAANLFGGGVRLKTLVKVFDIGDQVYVRGQVNTGEMTQITGKTGNLGLVGSFTROQVNVPTPIASTPRLVSPMNV                                                                                                                                                 |
| phageDNA_00012 | 6282  | 6807  | +      | hypothetical protein                                        | MAKVGIIRSSDVSKEVYAGDQVQAEFKVRGAVYKPFQVIAERAGQISKGVDMVKDEKAKLYHELLMDACAAHLEDWKGVFAEIVDQKTEYSEKPYTPENASKLLNGQISBWLFIKEGAQIQEDAKDKALKGWSSTNTKWRMRKRTKSSKSS*                                                                                                                                                      |
| phageDNA_00013 | 7310  | 7609  | +      | DUF4258 domain-containing protein                           | MCLTLEAKQLRAFARDTSKILTAHAKERMKERCIMKQICFEHGDTGTEGYPNTRGDQCLNVSVRTAGEYTTAVAKQSENGFSVYVYTFRE*                                                                                                                                                                                                                   |
| phageDNA_00014 | 7818  | 8076  | +      | helix-turn-helix domain-containing protein                  | MVHYEEQLSNWLRNGITFENEDQVGSIEVSEWELHWAIGLITQPKDLNGEERFKELNLSONLACGLGVSETDIRWEADRGLKQPTLELLRALYKHVGQDQKRSMEISLWQERTLVPSIESFYGNHSHWGTNCEA*                                                                                                                                                                       |
| phageDNA_00015 | 8181  | 8861  | +      | hypothetical protein                                        | MKILAAGLGLGVGATPAYNYQAPRNKSPKPSVKNKAFQDMLGGQVMDREVLNVENPKISFAYLTSGLYKLTGNEKGQYQFPNTVSGGVAQVQKRLADPFRKVMLDTEGLCVTVFNAKNCTDKHQATMTKVAASDNSFOQLTVSGKGNKRVGYREF                                                                                                                                                   |
| phageDNA_00016 | 8863  | 9126  | +      | tape measure domain protein                                 | MSAPOYKPMRESECVNAGVULJALFIAGFLFAGFRIEASVYKTEVWSGVMATGIGINGFLAQYFLQKVASLYRHNK*                                                                                                                                                                                                                                 |
| phageDNA_00017 | 9254  | 13594 | +      | tail tape measure protein                                   | MAQESRLVWSDNAERNARNLGNELVSEBGEFASKMSDLSVATRALGALGKLTSSASNDYTYGQNLKLVNQVNLKATFEDFRQAKTYSAWDSVQYQRPSSNAKTLNMDQYRLTETYSKAVASGSAEAMALVQFGALASGTLRGEEL                                                                                                                                                             |
| phageDNA_00018 | 13655 | 14242 | +      | Prokaryotic membrane lipoprotein lipid attachment           | NGVMECTPALAAHMMGMITVQELRSVNECKHDSIKWALNRVESDQVLTAKTQITQGBLTLNETHYKVEKSSQSAADQVLAGSQTILASNLINDGALVGYCYTRTALMCKDAENEMGTLASRQSLNWADQYHEATTAALNAWAKLHYRTATMETQMF                                                                                                                                                  |
| phageDNA_00019 | 14335 | 14733 | +      | hypothetical protein                                        | GATAATRYAQADAATAVTAQATAAQILNTATSIAGRLAKAGFLGGWGAGVATLGMGLAAAYSFYNNKAAEAKQKLEADKVAEKADEELKLTGDKADKANVDTAFNAQNKALSKSRAVSAIADENYRGNREVSQDEARTISTYTEALERNKLIKPTDLY                                                                                                                                                |
| phageDNA_00020 | 14733 | 15239 | +      | DUF1833 family protein                                      | ENLKGQADQYQYQASKLSADLKLRLEWELGNEADNAIQAHQKQADALGNTATFEEKATKALQDYQAKQSDVSIGSYWGLDKGYTVAGNAALDELQAKMGSAILSKDSDELSALNLNKEEQREDKLTEAKRQITGEBQAKLTKRLVSGISQIGTGTPLD                                                                                                                                                |
| phageDNA_00021 | 15236 | 15598 | +      | hypothetical protein                                        | VYVGSLSQGVYENHAKLQKSGKPLSYVSSISYRPNAPPTKASSTHGGDFSMFETPTTNAWAKDCTVYSKGGQSYVEFEDQVSLKLLHSPRMDQKMGKASKSSAKAGDQSLERQDQLQSLNEVASEYGRNNKARLEDDQKAFSESTAE                                                                                                                                                           |
| phageDNA_00022 | 15591 | 19016 | +      | Phosphatidylinositol-specific phospholipase C               | IKAEARRADNDIAKQALRTKLEDFKFEKTOOLEEFSNRKRNKAHLELSKEEQKQVLEEQQDQELGLLKAQERLPQARLSLSETAMQERYRLEREELKNTLSEEROKIALSKANDQKCTROKRVNNAQVWGGQADMGNGTEFFRQDQERFSLRN                                                                                                                                                     |
| phageDNA_00023 | 19084 | 19473 | +      | Ammonia monooxygenase/hemethane monooxygenase               | AANDLADQSFATDLDSEKGLDNLNHHGEKLIQODFENRPTWIAQAGDQNRQIAEYADQADQEDQYQDRUNQALGGMMQSLTSRQSGMFQEGQKAYKMFADKAYAAAGQSDQKAWASVSGFPANPLASAGAQASIANRAKQDQAFDQGTGSSG                                                                                                                                                      |
| phageDNA_00024 | 19473 | 20060 | +      | Endolysin                                                   | KYOPAGVHKGEVWVSDQIKRWGGVGLVENMKRANPEAFANALADQSDVMRRAMMSAFESQKQADFPQVQDQIYKGNRDTPKLASSGDLDFHGDGVYFSSNGLVQDRSLDQVDTLGSRRPQAEPMPSIEAPSTFNKVEQNVSGATVEAQOLDE                                                                                                                                                      |
| phageDNA_00025 | 20542 | 22860 | +      | TaB-dependent receptor                                      | QTVRWKDELQDLPTPKVPLVSDQANPSTSRSLTNTARRNT*                                                                                                                                                                                                                                                                     |
| phageDNA_00026 | 23142 | 24527 | +      | Phosphoethanolamine transferase EptA                        | MKIVISTTLGLTCAIPANLVRSNTMYQDDVSGNTALNRVRSNPMAQFYITYONNEGSEKSLIKQISNLTKYSMEHPKMLNPKPSTLNGGEEFEFKVPANKLLTFLTSVIGSTTVMQKVMQDYLQERNYELIRLKQKQDNPALLPTSEDAEYKCF                                                                                                                                                    |
| phageDNA_00027 | 24489 | 24935 | -      | Transposase DDE                                             | VYKEFDGAEKTKISS*                                                                                                                                                                                                                                                                                              |
| phageDNA_00028 | 25010 | 25578 | -      | TipA (transposase)                                          | MYKLLNPOTSGYVTPCQDVRQDMQDGRGRIEYDVKRNSHVQVNNLSKTDPMMAFWRVYQNKPASEYADLVDDQGTQDQVLCNFPNSEKTEHVENGNLYRVAQLEVYQVQNPNLADIALIKDWEV*                                                                                                                                                                                 |
| phageDNA_00029 | 25654 | 25977 | +      | Phosphoethanolamine transferase EptA                        | MDNEYAKFFFRNRYVYQLECELSHPSFMTYRVVRNDQRGVYVYHKEGSGQYYEFLPVSIQSRQMLQDLQDTLVYSISGLGVMPQEFERFIEGQYQPDVQYVNNRYSSDNLNSPMFYLLGLQLSSVAMNHKAVTFKASPRLNTTKTGDFALDRFSGLKGA*                                                                                                                                              |
| phageDNA_00030 | 26288 | 26776 | -      | SEL-1-like repeat protein                                   | MKSHOHLDRQYDEHYNCVHFHEAAMDLGYDRAEALFEMPKQKJLTSRLLKLLPLMPKGEQVAFHPRQRNKKPHVGLFRGKILLMESGYTLPEEVMEMFSNRVSYD*                                                                                                                                                                                                    |
| phageDNA_00031 | 26866 | 28239 | -      | Recombinase                                                 | MKVYKXDLSEKTEQATIGQWLTSKYHEMPEHVRHFTTSMQJHSEFANEVTRONALYQKLDLPGTFIVENKRWVAIVSVISUAFILMPTPSIAQDTQNTNGSSANLSENRKRNADNYGAGVNTPDIAVPPKYVNNREVEHVVGCGRHGYK                                                                                                                                                         |
| phageDNA_00032 | 28674 | 28937 | -      | DNA-binding protein                                         | NGAYDGETNDGAGAEVFRPQVDSYGEPLTGTEITPPLTVQDTSINQVLRADTQEGCTNVLHFAYNELRATANTDLTKYVSDNREVTNAGSTFNGDQTLKGYTVLSVADQRTLSNPAAJNANWLLKLEHQDTAAI SPKISSGSENGVPLDN                                                                                                                                                       |
| phageDNA_00033 | 28938 | 29660 | -      | CdII immunity protein                                       | VERSVRLCNFVATNGLYVYSSGQYAAVNTVEEYVTPVNESGAACNPALMKULQILGSKASRQTVGATLMDTTPGRCVBARRLTPTPTVTVYDEVKQWALGAYPLQSTVYEHETVRARTYATGALSVKSRKNFRLQRLMPTYNKAMITELPYSFADALVSI                                                                                                                                              |
| phageDNA_00034 | 29657 | 30064 | -      | hypothetical protein                                        | LDNRGSRBDELEBNTYNDVYDYGTAJAECTTDDHGLTGLTSHEDVYKMSYVLTQMDQTDVPLTPGSAANWVLLRGLPANGALSRDQFVNITYVNDQTKSLPHYAKQREYVDFSTNTANTYDERYLLNDFQYVDSGPRYDQLDNLRALYQMRGLDPTTGEIS                                                                                                                                             |
| phageDNA_00035 | 30065 | 30280 | -      | hypothetical protein                                        | SELLURDRAVADYRNGHSGEYVQSGLLTLESHVDYDGLVPLTQMDQTDVPLTPGSAANWVLLRGLPANGALSRDQFVNITYVNDQTKSLPHYAKQREYVDFSTNTANTYDERYLLNDFQYVDSGPRYDQLDNLRALYQMRGLDPTTGEIS                                                                                                                                                        |
|                |       |       |        |                                                             | FVYESGALVSSSSRYRPTRFVYKFDYNSPQKGEFAPAKATLEPAIDTGETFPPLVNLTKIGAVYRGSGGQDGLHAFAGWESDPYNTFTKTRDQFGDQGLNHRSHKULIDGGLTARGSGGGATPSGTYGLSYGVGGPGGAGAPPGRVMTQPSRSSQDQV                                                                                                                                                |
|                |       |       |        |                                                             | WYFGSYTVLNTTMEASVQKQVYTRQNYRQSPSGDGGWNGERTKSTNDTNNWVHSTLESGPSPSPANVAVKLTTLQNLGDLTL                                                                                                                                                                                                                            |
|                |       |       |        |                                                             | MEPVSTSGFTALKLYGIAMTLAVGLVAUVMTRMPRSPQEWAVGLCTVSYSLAGGSFVWQVGLHEWVTDMGMLGFFVFCVGLQWALWRVWFIKQEGKTEVKEFKARKDIENS*                                                                                                                                                                                              |
|                |       |       |        |                                                             | MPFSQGLHNETEMINEYDLKIREGGYVNNPADRGSETKYGTAEARTNGSKGMNDLPLDKAKAYKQYVTPDRFQVNVSSLVAELLOTGNGCTGFAPLLQRLNLNQGKAGVPLTVGIGYGPATLAKTYLAKRKGQGEKLVRLNMGQRYI                                                                                                                                                           |
|                |       |       |        |                                                             | EICERNPSDEOFFYGIWANRVV*                                                                                                                                                                                                                                                                                       |
|                |       |       |        |                                                             | MKPLALPLFAIQQVQAEARLALRVFKANALKENYVYDKEVESNTGIDALNTIGESTFGNAGAPVRSRLSVYNGEINFGMAFSGNNPDPDFIEFVNNKNTDNRKYGNAAGSVQIESGLPKPKEEKPKLDIVFRKGNDFQWGFNNDQKMW                                                                                                                                                          |
|                |       |       |        |                                                             | STNRPDSYSSVYKQNSKALCEDQFNSGSGANLAJQSDQKNSGSRVHYWKSQDQKQFNTENFQWADQGSFTDQKTSWGSKTNNWNPQYNTPTQNTKANTQDTPVNYKLQSYAKQAGNEGTFTYTGFGKLSADKSSQYQPSFLQNSFASDY                                                                                                                                                         |
|                |       |       |        |                                                             | ETLPVQWQDNRPVLNPNFQSSAEESLQQLSNKSGEYGTAKANEYNDQLELMKSGSKFLQDGLFSUNNIEGSGTORYLPNVSTSKAFLOEELNKQTLNTGYFRERIEHQDQDKLARNASRIENRKNYLNQYFGEYKVNFNILKQVQISER                                                                                                                                                         |
|                |       |       |        |                                                             | APENHELYSAAVHYSMAEGEQCLAPKPSKSLLECMFLNANWMLQVYQMPFENPMHSQVAVQNLPLKHYWQTQDQKGEIDLQNLNHNKLGGLQAFVKKVAVNTDRLANDQVYLMNPTNYGMLFWRNRSWKQKSSSYDEPLYLGNV                                                                                                                                                              |
|                |       |       |        |                                                             | IQEVLQGYNLLEFKDKILKKNASDFDLNGLNLEEARQNSPLVAPLPGRALQGLTHH*                                                                                                                                                                                                                                                     |
|                |       |       |        |                                                             | MAINVFKPKKQDVTLPNLLLSWGLFLNIGFPKKHQLTPNGKSVLFGATLVILAAVNLQNLNWKAKIFALGFGFSYVNTLGVISPDQIQNMQDVTDSFTDLSRLPLVTVFFLPLFQVTKQKQKASRLKKVYLSVASVAVGALLTVYVDFAAIF                                                                                                                                                      |
|                |       |       |        |                                                             | REHRLKMSQNSSESSUSLYYKAPKNNPLVYDQADQVQVQKLNPLMLVGETARASEFSLNOYANWNPRLSKQDFNFSQVSSGCTATAVSPCMSPMRPDVEQLASRREGLDARQVQVTDWNSKSGACQAREQVQRLNKKQWQD                                                                                                                                                                 |
|                |       |       |        |                                                             | ECYDQILDSQVLYATNKDQDRPLVUHQVSGHSPAYKAFREAYQPKPTCDTNAQIGVYVQNTDVTYDHLSQLMQLCTROISQNPPIRVLPSS*                                                                                                                                                                                                                  |
|                |       |       |        |                                                             | MYGRVLYISALQENGLLVVSPQFNAADQVYALRWELTELFCSLKGRQFNENLRLTPDRRQKVLIAJAFDVCVLTGEWQHQQKAKIKKHQRLSMLFRVYGVYQVMAQRLGLGKKEFKELIALRQNPDRIV*                                                                                                                                                                            |
|                |       |       |        |                                                             | MTHNELVLYNKYKWNKSHLKFCAALVILQKTNLSSAKSLPKCLPQSVYRMRQGFAGGYFYDROISLIFMFSDQVGLDRTNWWQGRNLMULAVYVGAIPALWTLNKRQSGTKEIRALQRIAFKGRQNVYADREFIGEOWFTLEQDQNFQIRV                                                                                                                                                       |
|                |       |       |        |                                                             | KKTSLSPI*                                                                                                                                                                                                                                                                                                     |
|                |       |       |        |                                                             | MINTLEISKYQTLWYLDQHGESTGEHLVHGSFYAIPSQGTHVPMIMVFSESWQHNLAQVNLSSQTKQKLSQNLFPSLLSLLDVKTOVNNKLMASQK*                                                                                                                                                                                                             |
|                |       |       |        |                                                             | MKXIFLAALATLGMACTTYQMGASGGVEATIDQNVQVRASNGYTHSIQANVLRKAAEKSGLCSYTSANNTSQSYNQNSIKVDAGLKTTPNGVYYSAGGATQYKLKPSINNTYVCFNEKPTPLGLVNNKYVGLSPMTGKFKVPSNRV*                                                                                                                                                           |
|                |       |       |        |                                                             | MAQHKTFSVDSIPLSEKQIYRQTYTGQFCVGTGYSFAEKKMPNGKSRKRYGVKQVLYLEQARTKILLMDEGVDPKOKROLASAJNDALQKLPVLTSEAYQYKRLKRLAESLVAIDGCEYNSQWQKLDQTSAMIDRHLKLSKASPRANLASF                                                                                                                                                       |
|                |       |       |        |                                                             | LHALPNTHSIRSGENKLNKINPVVKEEAFKIKRRKVRADQREAFALVATYVIMGEQNDFRAYTNDQFLFALTGRFSEAESVEYNVNDLQFGTIKINTKNDHLLPMGDTLWHMRKERRKQAGQNVYTRDNGVSHSDRRAARDKVTENGSEFTF                                                                                                                                                      |
|                |       |       |        |                                                             | HDLRRTFTGIANSLAIGSYTKRLNHTTDGQDNDTQDQVQFDQKALAMNMDVISEPVALKSLFVEXNESPQAGELNHHQVLDNFNMAQGLQF*                                                                                                                                                                                                                  |
|                |       |       |        |                                                             | MSESTLVAVAMPPEGYSPKQTPAASKIEAVERVYRKMHEGNNFLFEDQVQKQWKSQRKQNLNVYSEVSEPMQCFDLKTAERVKFDEYVYKGSAPLTVKSEDEALFYSGETKFQYQIQEPPEPLFNWHPDIELDTHEEGEAATREQWAO                                                                                                                                                          |
|                |       |       |        |                                                             | LQMLRVIEETLQVDEPAPSDAVVWNNPSPQGLFLNAFQESDPLVWVWAKSEKX*                                                                                                                                                                                                                                                        |
|                |       |       |        |                                                             | MTGNRPFESQFTEFKRESARKNDLAFSETMNGYFNVTNDWQLWNNAKAETVPTTTPSVTLCAELKEAFDFGAPDGEKQFQMETEMTWKLODQYQGEYGYCWADPEEGKQLGVSSGEAG*                                                                                                                                                                                       |
|                |       |       |        |                                                             | MLGFMYYLQLGYVIRQMDQAMFTKHYPVAVWRRITDYHNRKNPAQQLYKFEVTEWKEYEAMJA*                                                                                                                                                                                                                                              |

|                |       |       |   |                                                |                                                                                                                                                                                                                                                                                                                                                                                                                                                  |
|----------------|-------|-------|---|------------------------------------------------|--------------------------------------------------------------------------------------------------------------------------------------------------------------------------------------------------------------------------------------------------------------------------------------------------------------------------------------------------------------------------------------------------------------------------------------------------|
| phageDNA_00036 | 30318 | 31250 | - | hypothetical protein                           | MKLNVKARLAWANGELLVNNTEGKWPFFNYDFGDFVDFKFEFLKPTRTIGFEFVPEPRVAPKVGKSTCSYPSPTVELGVQGFVQVWNSKGQLRMLOHQGVHVSDFNAFHCAAKISGGFEADLLKAKPTTEEVEEEKPSHSAESLVKNSKPEVVEKAQTAEPAIESETAQSEYQKLDLTLQVRVQSDKPTQEVNAYVRYTRTVSDKMEPLLLATHHRELLEKSAQATEPSSLMVQIQNAPDLTLDALIEVADRPQISRMDFVQRRFLENPTSTPQEAEPDYLLGDGF                                                                                                                                                   |
| phageDNA_00037 | 31247 | 32383 | - | ATP-binding protein                            | MRIRKMLPITADGTLTVQAIIVYLADPGLKSGMSGTAKAISDFDRGAHTGELRRGAIVQVQVQSDVANLTQDLAPYKTVIDTVGAMLEKIKHLLTANNRQKQDSLKLKAQGLANQTKQYNTLSLGDVYFIAHASEDQNGDQIYRPDLGKNRNLRYADLMCHYTVTTTGEQNAWHPKPSPIHAKNSGALGETGEVWVPLKAPHTPLADLTQAKNDHLLTPAQLAAKAGEELNWKGSCEAEHAGDLNQLTSEKDEHMHYQNMQRAMMRKALNCTQGRGTWVSPFENGISQDQDELGNFAERGLDNKTVCEHFGDALQIEAAKLTAWQIETLAKTGMTA                                                                                                 |
| phageDNA_00038 | 32380 | 32703 | - | hypothetical protein                           | MSNFKHPDGYMSFLGRDDKGLYSVRIGVQVYVANSVSLYKVKDGVKTLNFRFGQTSYKWNELTQIEQDFQRQKLAKEITNPTTYDRKAYKQKRGFTGSR                                                                                                                                                                                                                                                                                                                                              |
| phageDNA_00039 | 32696 | 32986 | - | Ubiquitin-Binding Zinc Finger                  | MKDYNCTCKKMPVDRSKKAGDEVSRVTSQSSKARFSRREGVNCREGDVLVKRYKEIFLNRDVPVDAPEPLYAFVGTCECKEAEH                                                                                                                                                                                                                                                                                                                                                             |
| phageDNA_00040 | 32986 | 33426 | - | hypothetical protein                           | MNVKTSNKHKVGTATIAVLVLSSECYRTANSSVPKNYSYSEQVASEVELLAVKKTGEKSGEAVIRDGKLVNSFDFGDVADSVAGVSQFTTAEITNLAIDSVTDLGSKSFNDFTNHQHNKNNLAGYDRNNWLEAA                                                                                                                                                                                                                                                                                                           |
| phageDNA_00041 | 33635 | 34138 | - | Actinobacterial Helix-X                        | MAKRYLPFYNNARFIALVGLFAIFSIKYLELNTINLVQSFVLLDLGQYLYKGMALAKLDGLNQSEDRLLTSTDVDRSSSLVYAMFILLVFSMPLNLLGLSAKHLLALISVGLTSISFFLAWSDLREISLEKTKDRKSEAKAKVLSNK                                                                                                                                                                                                                                                                                              |
| phageDNA_00042 | 34140 | 35192 | - | hypothetical protein                           | MNPTQYFRAIEEEMSKTVVKDKTVHYKKVDFLKGANLQGLKQLKQDSFYVYKAINRQGVSATKDDFLINHASSHQSMFFGELIVESQKAAQVAKIDSDQATEFFIKTYLTDLPDDEDGVATEVVRKEFDVLYFGVDINHVAIQSRSLTARTLESYLGLWLEAAKALPENSALIKDAPNPTVYQKLESTPAKTSISGSGTSELQPVHTVESSIPAKDITIEDVVDLKSAGVDLENKLDELGDANLKLKLTITNRKTRKSGQKYDVTASSMRHNDQYVTLTLDGTXYTADNLKMSGKSIVETNNKYNDGLKVLGYWMTTNNFGD                                                                                                               |
| phageDNA_00043 | 35199 | 35414 | - | hypothetical protein                           | MDNSKRPNGIARINDAAKHGEALVTAEEVYKLSKDGKVFIPVLTNEQVVLKVEKLGHWKNTG                                                                                                                                                                                                                                                                                                                                                                                   |
| phageDNA_00044 | 35429 | 36193 | - | LexA (C) repressor                             | MNTLAERLYAMEVLPPKKQKGVLEARAVGWKPSVDWLSGKSKTMEGENLRASKFLNWPWSLASGTGEIQSSTRKFKLODIEAFKXKYNSDSDEALLFTSTIEKTPFSKRWVPVAKYKMGMDGYFTDMGYENAGDGVVPTHSAGPRAYGKGTGDSMFAIRNGWYVYCGDQADLVNEFVQVCLKDGRCITKEFVINGGVNLSLVWGGGERPFTFEMDEVESITATDVPSPQHRGEPYSH                                                                                                                                                                                                    |
| phageDNA_00045 | 36302 | 36553 | + | Cro                                            | MNDALQDLKGGVTAVARLGIPTTSPVSGWKAIPDKKRLVIAEDGLTTRKFLFPNYQDIWELRPQITTKSRNLGSLTA                                                                                                                                                                                                                                                                                                                                                                    |
| phageDNA_00046 | 36554 | 36884 | + | Bacteriophage CII protein                      | MSKVSNELPASASNNLSQALNTSNQRQVAEKVIGDASTLSRMKNDKKNGLTEIFISLLTAIGLVVPESDVYCSIEAEATRYLAHAFTSPHYMRFLK                                                                                                                                                                                                                                                                                                                                                 |
| phageDNA_00047 | 36841 | 37215 | + | hypothetical protein                           | MHSLHLNTCGFYSNKPLPAGTVGRHSNEVDQNNLNLSEQILNPSDFLGQVYVLTKECRFSKNDLFEVNNKTLRLWTKSEHLLVSKERTATVLENAKPRLLKAEQALAEV                                                                                                                                                                                                                                                                                                                                    |
| phageDNA_00048 | 37212 | 37511 | + | Iron-dependent Transcriptional regulator       | MNSQKPKPEYKQTEQISFFDAPLNLHLDNRNKLRAKGVDENNAAITREEFSQTAQQRFRINQWLAGVNSLAAADLVQKFGSYKPKVGVHE                                                                                                                                                                                                                                                                                                                                                       |
| phageDNA_00049 | 37504 | 38385 | + | Bacteriophage replication protein O            | MSNFPVNSFOVNAFDEVLNKSDAAKCYLVICRKTGWNKEMDSILTQFEETGKSRTYVCKLNLKVLVQEPSTHNTFLGNDTSGVLVLKFSQNLPEYGTQSKNSLPLVNFNYTSKQFLPLLKFNTOGSKNSQSNKKXNKRPVESEKPKSEKPTEFNRLVELPACVDPELWNFVOMVSIKKPLSENAAVLKLLKLSFGLPLAQSLNLSIGVYQGVTEPRQNGQENPQSHNVPEEPGYTQMYAESNRSNVDVTPVSDQFGY                                                                                                                                                                                |
| phageDNA_00050 | 38388 | 39188 | + | Replication protein P                          | MNELAPFESFLKJJAARTKYAVQFNWNPVEGKNAPMOVEQLAKGVQVTPNLQRLGLFYASTNTYMPNFAFRAMCMGDOWSSEAKAWKACEYTOISQHKVLPDGREQNEITLTKFVLDOVYLSQDGEYKAKMEFYDEYKAEQKGTQAWYQEPILAAQKNEQKVPVNSDEAQKQLQSLMERKINGRKVPVQKKAKEPELKDGLGDPQDNPHYAEAMCRREGMPPRNLKIDGAN                                                                                                                                                                                                          |
| phageDNA_00051 | 39185 | 39319 | + | putative phage replication protein             | MNKFELAWGLISFTTAISGAVWWWLARKLEDKGASHES                                                                                                                                                                                                                                                                                                                                                                                                           |
| phageDNA_00052 | 39288 | 39728 | + | Ribosomal protein L7/L12 C-terminal domain     | MRKEPAMKATKLIRQKGLQYAKEVDSAPNATEWEGYFQCGQSGESPADREKYVLDLVELKLVESKINDLGGVEKLTPTAITDKHWGYTHRMVNGNLSRFLDQFCDPQDGSIRKRYMATAIRDSYSGGESHAN                                                                                                                                                                                                                                                                                                             |
| phageDNA_00053 | 39718 | 40140 | + | hypothetical protein                           | MPTRYNTGEYSOLEYHVGDSASMEMLRAUELLTHPLSGRYVWREAYTTFWTKCGDQSGWMEFCVGPHEFHIDGALRYVSGSDITYNQKDRYTLVGEKXKVKCKACKGFGIRDDQWGHQKCEMCAEKGASHES                                                                                                                                                                                                                                                                                                             |
| phageDNA_00054 | 40133 | 40357 | + | carbohydrate binding domain-containing protein | MSEFEKSKQWAWKEQKQAAKVELQKRLDALKGTQYALQYVEEDMRGNHFLQAMMRTLKAEQVLKGA                                                                                                                                                                                                                                                                                                                                                                               |
| phageDNA_00055 | 40357 | 40758 | + | DUF559 domain-containing protein               | MSSVSAEYRMLFPKKXKRRSAKQVAPQSVGDEVLAHLRAKQGEQYKFERPKWRADFLKNGSKLIEVEGGVSGGRHTRQKYLGMCKYNSAAMCGFTVLRFTEDQWSGMALIKELLIK                                                                                                                                                                                                                                                                                                                             |
| phageDNA_00056 | 40769 | 41521 | + | hypothetical protein                           | MLVEKDFEELLRLAAQKGAEGKSKDLYLGEALLSPAALWATLVLEKVFERAIATPAQKQTTETYSKYDFNFOTERRIEDPKQVEFVRGEIKSGNFRARNKLAVEHKEMKKKPTTNAQGLNLAKGMAEILRHGHVFAKMGCVCOGLKQETFLGNLPGNGARFCVCKAGTGRPYTLUEKMANAGADATKTAIVKQKXFLPFGSMADEVENERTRBSRFFELPQSGEYTA                                                                                                                                                                                                              |
| phageDNA_00057 | 41943 | 42388 | + | hypothetical protein                           | MTQVLMFAENYKMKDEELFSDCIENMNLMTCIREIKGETFLKYNFIDVELFSRPLKQKQKIDVSLPPHNSGEYILWLAGLIEKTEGGPKPPPKKFIPEYMSLKFLDPLNEEKIQNEKQETDYNKLYKATFK                                                                                                                                                                                                                                                                                                              |
| phageDNA_00058 | 42480 | 42894 | + | hypothetical protein                           | MOSTEYFWLTRKPEKTPKSRPLKAKQKYLEAEATLKEELEDLAGFESKFPQHTKWRFDHVLKRLIDIEGGPWSGGRGKLSKAWSLNRYDHAEEMKYKIERFPDLSLGVYNNKSLAREHEDGADQTDST                                                                                                                                                                                                                                                                                                                 |
| phageDNA_00059 | 42863 | 43504 | + | hypothetical protein                           | MEQRPFPPTDFDQAEFEAIRTPADLKNNVYANNLTGGPINPHDHAELLVONDEFALFAHVASAYKSKQAMLGQCEKVMFNVGWRKARGEQQMRDWFQFVPTLYLVDAFSCERANDTEFCYLLHELYHQVMRDEDEGVYSDSSQLKPLVLAHQHVEEFIGVWRVGPSPKNVRLLEVAKNPPFVSLNDISKCCGNCV                                                                                                                                                                                                                                              |
| phageDNA_00060 | 43563 | 44033 | + | DUF2280 domain-containing protein              | MATLKEPVKIFVIGSLACRDTQGEVAELVQKQFVGDIVQVATVPTKVAGNLKKYVELFECTREFDKGLDIPANKYYRLKQYQROLEKTRNWKTLKILEQAQKDGQGTNRQETTKDGGPQVQTNSEIPVMEDYLKARREVLDEY                                                                                                                                                                                                                                                                                                  |
| phageDNA_00061 | 44023 | 45450 | + | Terminase large subunit                        | MSTDAAKRAIEAQEDLYFTYRMFKERRQYVMWNNHLEICEALMKVYGEIKRLINVPYRYKTEIAVNFMAWCFGNPCDFHSHYSAMLAANNAFQRTLVOEEAYRKVPPELLTRDQSKANDFWRKTSQGVQYATGTGTTGFGAGKLKRGFGGCIIDDPHKAHEASSTIREGVNDQNTLESRTNSPTTIVMRHLEDLAKWLLGRRQDQPVAGGQSGVHEHCLSAQEDGSALYPAKHNKRLMEZAMPYVFAQZYQMPSPFAGGFFRPNQNDIALPADYVKNQVADQFATENESDFTVSVREALGDSFTYNDVTRGQLGPDNVRKLEQTAKIDGAKQKLVLLPQDQGAQSSQSVLLLAGYVIAKPSGLTRAQFPAQVNGVNRMLKGEWNKDFIDELRHPFNGTHDDQVDAASDAFNLHEGFEAFFADMFGAR      |
| phageDNA_00062 | 45447 | 46898 | + | DUF4055 domain-containing protein              | MSDVTOHAEYKMLPYWQKLDVQCEGDAVAKGKYLPMPNAHDKSPANKSYEALVTRAVFYEVTGTLNLSLGMAFATDPSFKFPELAHLERNWANGSLTSLQAQNGRHLLKRYCALYVDVDPVPRARLAEKAKAYPMHLLNALDWNVWSMDQKKLCLVYREPSERAGDQFKTEGQYVLRLEKQNGEYYSQVYTHSEKGNVSGEKVPTDYNNQWVTHPTTSGANSEERKQPLSLJALNLAYRSDAQGESVIMQSPQYKAGWNEVTOAKKRGYSEKAVLLPLPEKSGLVGNQDNTLAREAMKDKWEMKEMGARLEKSGSKKTATEANSODAVQHSVLSLCVNMNLEAALRLAAKVFVTPNVQVLTQDLMEFISEQEFNKQGYLAELARQLFEALQGRSSFSWWEVYQGTGMFPKQKYEEELQNVFAEQDGLNQKVE |
| phageDNA_00063 | 46900 | 48003 | + | Minor capsid protein                           | MATDKRLEVLTOHLYIRASSTKVELLALFNQDTSKMSKRLNDELNESEVLAQGRVTSNLRERDLQWFAVSNLALPEAFVATALAVYEAANYAKLVGAKNPDGEKLLSAKPLAGALVDLLSRSAESARQVKEYARDGNSKNTQENIVORIRGTRKLNVEDGLNGTKTDERTVTRVRSWANGAYVNSQIGFEYRVFVSLDGRTSKLCASLDGSEWENDPAKPRVHPNCRSLVPEVKQGLVGERPVMIDERKQDIPKEERSQLGQLDANTTFKEFKKTDQDFQREWLGPKRKLKQDGFDFKDFQEGREFRYSDDLRLDEKAFKGLL                                                                                                              |
| phageDNA_00064 | 48012 | 48440 | + | hypothetical protein                           | MLYTLKHQNLVNMKTAFVCLTLSITCLAEPSQKYKEYDRLSLEASAMANNAYSPDATGQWKGATGGLAENNLRAAGAKNLTTFLKDNLEESKELYSIDGAETLDKNYLSGGQGEQQLVNLKXDLVTGTFNCE                                                                                                                                                                                                                                                                                                             |
| phageDNA_00065 | 48539 | 48781 | + | hypothetical protein                           | MSESKYRHLVKRVSOKSSHALLCDEETGFLAGLTAVKMCVFEGPATTTATFDVGGPQGRLLVGDEPRQKWSAKET                                                                                                                                                                                                                                                                                                                                                                      |
| phageDNA_00066 | 48989 | 49190 | + | Occludin homology domain                       | MPSPIQYFYDEHLEPHLQGVSPGDLARQMEQLPDGPKSTGLKRLFAKDAFVRAQLK                                                                                                                                                                                                                                                                                                                                                                                         |
| phageDNA_00067 | 49304 | 50071 | + | Telomere regulation protein Sh1                | MKLTYTIDGKYVAEVDGKPYIHDDGKEMPHADPHAVIARLNEAKTHREAKEAAEKALKEGIEDPAANKALQTLNLDOKLVDAGEVEKYKAEAKVEEYAPVQAQDALEASHKEIJGGFARSKYQDNVAVPDMQATTFGHFKIEEGKYVAYDPNGEKIYSRVRPEELANVDALSLVGDYQKDLKAGKGTGGGFGGGKGGAPTMGRSEMSVSGADYKEHGDAMKLN                                                                                                                                                                                                                  |
| phageDNA_00068 | 50449 | 50619 | - | hypothetical protein                           | MRPNLSPNFRIPRYNALRPSTTLFATMSGLLIEAKFIAKLYSNRPATNASARS                                                                                                                                                                                                                                                                                                                                                                                            |

```

LOCUS       phageDNA_Annotation      50929 bp      DNA      linear      23-JUL-2021
DEFINITION  final.dna (50,929 bp).
ACCESSION   phageDNA_Annotation
VERSION
KEYWORDS    .
SOURCE      Acinetobacter baumannii bacteriophage
            ORGANISM Acinetobacter baumannii bacteriophage
                        Unclassified.
REFERENCE   1  (bases 1 to 50929)
AUTHORS     Kim,K., Islam,M.M. and Shin,M.
TITLE       Direct Submission
JOURNAL      Submitted (23-JUL-2021) Dept. of Microbiology, Kyungpook National
            University, 680 Gussaboseong ro, Daegu, Daegu 41944, South Korea
COMMENT      Bankit Comment: ALT EMAIL:maidulbau6923@gmail.com
            Bankit Comment: TOTAL # OF SEQS:1.
FEATURES             Location/Qualifiers
     source             1..50929
                        /organism="Acinetobacter baumannii bacteriophage"
                        /mol_type="genomic DNA"
                        /strain="Acinetobacter baumannii bacteriophage 1656-2"
                        /isolation_source="Acinetobacter baumannii 1656-2"
                        /host="Acinetobacter baumannii"
                        /note="[cultured bacterial source]"
     CDS                192..857
                        /codon_start=1
                        /transl_table=11
                        /product="stress-responsive nuclear envelope protein"
                        /translation="MKIIYTRIAAAAALETGIIANPDYYENPNLKAKEVIIYGNYPKI
                        QKDYESLEVPVEVRKLEVPQKTTLATVNVAVGITPELQAVMDDAKAECEKVVEENTQL
                        KQKIAILEQAGGNQSELLSENSRLKDAAVLADKALKDAEAQVVGIKTEFEAFKNDIPA
                        MQARIAELEAGKAAENPATETAANDFENWSNDQLKEYLASKNIGYKPSATKAELLKLI
                        PKE"
     CDS                862..1251
                        /codon_start=1
                        /transl_table=11
                        /product="T4_neck-protein"
                        /translation="MSFITVDDANSILGSDFPAPSDKARLVKLIANVWMKNRIGFVPDP
                        IDPLLKDAACEIIKGILAKVIYNGKEQQLKRKKVKADSVESKEFEQDGSSEAISSFQEI
                        AIDFIDSLDLKDPNASFNGFGIPLYRA"

```



CDS 1208..1621

/codon\_start=1

/transl\_table=11

/product="hypothetical protein"

/translation="MQVLMALAYHFTGHDMGLRDEIQADIAEAFNDDLADAIHTFTCE  
RISKTNWDPKTTETTYVEVKENYSGRGVLFGSYSQYEIQTLGVLATDKKATVQLQNEVTMT  
PKIEDEWLTA LGSFRVINIQQDPANTIWKQQLRKV"

CDS 1600..2034

/codon\_start=1

/transl\_table=11

/product="Peptidase"

/translation="MSASKSVGAKMVNPDYVPEWYISPFQHVQYTLARNQLHMDLLFE  
DMDKADQFLDMGADAQVSTFSDGAYAIVQIGDTADKDRIQVYGLLLHEAVHVWQKIKK  
LMGEREPSSEFEAYSIQAIQDLFKMYEESVNDGMEGEKAN"

CDS 2006..2374

/codon\_start=1

/transl\_table=11

/product="hypothetical protein"

/translation="MGWKGGKPTFEFSFDVSKAAEDQVKHIVMDTVQSLVNLSPVDTGA  
YRASHIVSVGSADFGVREPETNPINDAAIQAMKIKLGNLVYIQNNKAYGPRLNGWSD  
QAPQGIYGLTFNFISQKYGG"

CDS 2382..2774

/codon\_start=1

/transl\_table=11

/product="putative Electron transfer flavoprotein subunit  
beta (etfB)"

/translation="MTLEQTRQAIIDRMQSFTGIAQERIQYPNAPDFTVPTKGVWCRL  
TIAGGPSFTSGIADKPCTRRGTGNIMIQCDFRLHTGEKAVTVLS DALLAHFEYFTIEHL  
ECLNGQSIYAGKDADFIQYNVSIQYKVN"

CDS 2776..2994

/codon\_start=1

/transl\_table=11

/product="hypothetical protein"

/translation="MSCMLTLEEIEIKRQELERHLEDVMSVELSKWQSENKLCVSDVN  
IRLANVVS LGGPKHNVVTGVSVDLDNEL"

CDS 3103..3624

/codon\_start=1

/transl\_table=11

/product="bacterial SH3 domain protein"

/translation="MKKSTLGWGAAGLVALGIFGSGNDNSPKQTS DSENAQSAVEEVI"

```

ESKYINTNSLNIIRDKNQVVGKLGGRGEKVDIYEMKGNWARISLNSSSPQWLSTKLLC
ETDGCQKQSRSTTSNNYQALKSHPHHSERKQKKTYYDSDCSCAVVDYCVGPRGGHYC
ITSGGNKRYKPRY"

CDS      3721..4074

/codon_start=1

/transl_table=11

/product="hypothetical protein"

/translation="MSNFVFKRGDTFNLNLQLVDMDEALQYPPDDVRRRAIDLTGYTFT
SQVKALADGATVATLTCTALSQSTQKGWLNKSSASTATWPLGLCQMDIKAVVSGTTQ
HTETLTFQVIDGVTA"

CDS      4074..5252

/codon_start=1

/transl_table=11

/product="putative tail fiber"

/translation="MANLVFKFSWDHRPFPYNASQGKRQFMLPFASGIPNLAPNFSQV
VGTAAISQGGTGATTAAGARANLGAAASGVNSDISELKGLTTPLSISQGGLGADNAQT
ARMNLGLGTAAVLASTTSQYDPTPGRALRVGDWIGAEGRVSDMVAPLNNGFFRTDD
TLTNDTGNSIGPYGFFLHCTRRSMGLYTNGSHSFQLGKAASYSALKYRFNNSGTWSNW
FNLLTAQNTTTDNGNFIKAASPVVKLFQSHIELNNDAAKQPITFDKLGTGDYLIKGS
LGFQAEQWYIEVPKDANGNTVVAVEYSTLENGDLSIKTYKRKFDVEKAAIVADLENPLD
IPEGRWIDIRLHEEPEPEPEEPLSETPVDFQPTNLSQAVAAAMNGVEPPEISETDETL
"

CDS      5305..6222

/codon_start=1

/transl_table=11

/product="hypothetical protein"

/translation="MSSGAKIRLYACEEAVLGTTTPANPVWYTVRRVTDSTENVTED
SSEVVDSRFRQGAVVTEAEVTGQLEFELSLGTFDLFLNVLAFNNWAANALSFGGGVRK
SLTLVKVFEDIGQVFIYRGIQVNTGEMTIQTTGKITGNFGLVGSSFTRQQVNPVTNPI
PASTRPLVSMPNVEKLLINGQSIQKACLQTLTINFSNNLEAIRCIGSGKYTPEFYLE
KMMDIGVNANFMFSATSASWIDAIKTRDVFTLTFDITDTKGSKYSFNFPQLEVKEANH
PDGGGDDIITIDINFAQVRTSPTIVRALV"

CDS      6292..6807

/codon_start=1

/transl_table=11

/product="hypothetical protein"

/translation="MALKVGIIKSSDVSKWCEYKGADGDVQAEFKVIRGIAYKPFQVAI
ERAGNQISSKGYDVMVKDEDAKLYHELLMDACAAHLIEDWKGVVFAEIVDGKTVESEK
PYTPENASKLLNLGDIGISIWLFIKEQAQKIQEDADKDKALILGKSSSTNTKKRMRR
KRRTKSSKSSS"

```



CDS 7310..7609

/codon\_start=1

/transl\_table=11

/product="DUF4258 domain-containing protein"

/translation="MCLTLTEAKQKLRAFARDTSKIKLTAHAKERMKERCISMKQIIC  
CFEHGDITEGPYPNTRGDCQLNVSVRTAGEYITTAVAIKQSENGEFSVVVTTFRE"

CDS 7618..8076

/codon\_start=1

/transl\_table=11

/product="helix-turn-helix domain-containing protein"

/translation="MYHYEECGLSNIWLRNGFTIENDEYDYGELVSIESVHELHNAIGL  
FLITQKPDNLNGEEIRFLRKELNLSQKNLAGLLGVSETSIHWEADRGLIGKPTTELLR  
ALYKEHVQGDGKLRSMIESLNHQERTLVPSEISFSYGNNSWHQTNCEIA"

CDS 8181..8861

/codon\_start=1

/transl\_table=11

/product="hypothetical protein"

/translation="MKKILAAGLIGLGLVGCATPAYNYQAIPKNISKPPIGSVNKAHV  
GDQMLEQGMVVDREVLNVPENIKISFAYSLTSGIYLKTGKNEKGQYFQPFNTVSGGGM  
VQKNPLADPFKVVMLDTEGKLCVVTVFNAKNCTDKHQATMKTVAIASDNSFQQTLIYS  
GKFGNKINVGYREFSSNQARPAFNNDVEYDLSQSKQIGYKGALLEVIDATNQDITYKV  
LKNFNKVD"

CDS 8863..9126

/codon\_start=1

/transl\_table=11

/product="hypothetical protein"

/translation="MSAPQYKPMRESEVCNAIGWVLIALGFIAGFLFILAFGRIEVAS  
YYGKETVWSGVMIATGIGIIFNGFLAGYLFQKVASILRYHENK"

CDS 9254..13564

/codon\_start=1

/transl\_table=11

/product="tail tape measure protein"

/translation="MAQESRLVIVIDSQNAERNARNLGNELVSIERKGEFASKSMDSL  
SVATRALAGHMAGLLTVGSAISKMDTYTGLQNRLKLVTTNNQVELNKATEDTFRIAQKT  
YSAWDSVLQVYQRFSDNAKTLNLTMDDTARLTETVSKAVAI SGASAEADAALVQFGQ  
ALASGTLRGEELNSVMEQTPALAKAIAKGMGITVGELRVAAEGKITSQEIVKALRNV  
ESDVDALFAKTDITIGQSLTLLNNEITKFVGEAGKGSAAQVLGASVQTLASNLDLIA  
DGALVVGIGYITRAILMKSAAIKEGMASTLASRQASVLNAQAEYAEATAALNAAKAHL  
ANVRATNAETQAKFGATAAATRYAQAAVTAATNAQTAAQIKLNTATSIAGR LAKGA  
FGLIGGWAGVATLGVMGLAAAYS FNNKAEEAKQKLAEQAKVAEKADEELKKLTGNDK

```

AKAVNDLTTAFNAQNKALEKSSRAVGSALIDIENYARGNREVEKISQEARTGTISYTE
AIERLNKIKLPTDLYENLKKQAAQYDDNASKASLSAEKLLRVEVKLGGNEAQNAAI
QHQQADALGNTATEAEKATKALQDYQAKQKDSVIDSIYKSGWLDKGYTVAQANAILE
LQKAKGMSAILS KDEIDSALRNKIIIEQQEREDKLTEAKRKQTQEIEKQAKLTKRLV
GISGQSGIGTGPHLDVRYGGSLSGQKVSNEHLARLQAGGKPLTSYKISSNYGPRKAPT
KGASSFHKGIDFSMPEGTPITTNVAVKDIKTWYDSKGGGYVSEVIFEDGVSLKLLHQS
PKMQSKVKGGASKGSDKAAGDIQSQLERQQDLQRSLENEVASEVGRINNNRKARLEDV
DKANFSPERTAEIKAEINRRADNDIAIAKQALRTKLEDYKEFQKTEEQLLEESFNKK
FNAAHDLLELSKFEQKQAVELLEQQKQQLGLLKLAEQRLFQARLSLLSETQAMQERY
RLEREEILKNTKLSIEERQKLIALSKANQDKETRDKVNNAVQNWGGIQADMNGTGEFF
RQDQERFSRLNAANDLADSQFAATDLDEKNGLDVLNAHMEAGLIKQQDFENRKTAI IQ
AAQDQRNQIAAEYAQNAQDI EDKYHQDRLNAQIALGGQMMGSLTSMFGSMFGEQSKAY
KIMFAADKAYAIAAAGISIQQSIKAASVGF PANIPLIASAIAQGASIIANIRA IKDQ
GFADGGYTGS GGKYQPAGIVHKGEVVWSQEDIKRWGGVGLVEKMRKSANPEAF LNNA
LADSVMMRRAMSSSAFIESQKQADIFNQPVQDTQIIYKGNRDTPKLASSGNLDFHDG
KVYFSSNGLVQDRSNLDDVQDFTLGSTSRPQAEMMPSIEPASPTINFKIEVINQVSGA
TVEAEQLDEQTVRIIVKDELDKQLPRTVPKLVSDQIANPNSTISRSLTENTTARRNRT
"

CDS      13655..14242

/codon_start=1

/transl_table=11

/product="Prokaryotic membrane lipoprotein lipid
attachment site"

/translation="MKKIIVISTTLLGLTGCAIPAVNNLVRSTNMYQDDVSGNTANLR
VYRSNIPMVQFYITYQNNEGEKISKNLITKQISNNLT KYGSMHEPKKLNMPKPTISLN
NGEEFFEFKVPANKKLTFRLT SVIGSTTMYSCDVKMDYQLERNNGNYELIRLKQIKDFV
NPALLTEPSQDEAYCKFVVKEIFEDGKETIISIS"

CDS      14335..14733

/codon_start=1

/transl_table=11

/product="hypothetical protein"

/translation="MYKLKLN PQTSGYGVT PGDDVKRQQMDGGRGRYYIDVKRN SHIV
DVNWNLSKTD FNKMMAFWRVYQNK PASFYADLV IDQGTRQQYLCNFIPNSFKTNEVNG
NLYRVNAQLEVVQNQPNLNADIALIKDWEV"

CDS      14733..15239

/codon_start=1

/transl_table=11

/product="DUF1833 family protein"

/translation="MDNEYAKFFFN RKVDVYQLECIELSHPSFMNTYRVVRNDDRGVY
VQHKEGSGQVYYEFLPVSIQRSGMLGDLDQTLTVSISGLGDMV PDEFERVIEGQYPDV

```

```

KPTVNYRIYSSDNLNSPMFYLLGLQLSSVAMNHKAVTFKAESPRLNTTKTGDIFALDR
FSGLKGAII"

CDS      15236..15598

/codon_start=1

/transl_table=11

/product="hypothetical protein"

/translation="MKSHDHLDRQYDEDHYNCVHFVHEAAMDLYGIDRAEALELFMQ
PKGKITFLSSRLKLLNPLPMPKEGCIVAFHPRQRNKPPhVGLFRGQKILHLMESGVTY
LPEEVVMEMGFNRVSYSD"

CDS      15591..19016

/codon_start=1

/transl_table=11

/product="Phosphatidylinositol-specific phospholipase C"

/translation="MIKVIYKKDALSEEKTIEQAQTIGQWLTSKYEHMPEHVRIFFT
SNMDHAEISFANEVTPKNAYDLKQLDFLPGTFIVVENPKWVAIVSIVISIAIAFLMP
TPSIAQTTQNTNQSSANNELSNRENKIRVNGRIADNYGAGWNTPDLIAVPYKVYENN
VEVEHVVCIGRGHYKINGAYDGETNIVDIAGASVEVFRPGVDIVSGEPYFSLGTEIT
TPPLTVQHQTsvNGQVLRPADTQSLEGtNYLHFAYPNEILRATANNTDLTTKFVSNDR
VEITNASFTFNGQTFDLNGTYSVLSVADDRMTLSNPAAVNANWLKLKELNNQQTAAALS
PKISSIGEkwIGPFILDNVERSRVLCNFVATNGLYTVSSGGYQAAVNVtIEVEVTPVN
ESGAAIGNPMLKQIILKGSAKSRQTVGATLDMVTFQGRCSVRARRLTPTPTVTTVVDE
VKWQALYGAYPLQSTVYEHETVFRARTYATTGALSVKSRKINFDLQRMlPTYKNGAMT
TElyPTSSFADALVSMALDDKIGRRSIDEIDLENIYRTYNDVVDYFGTPLAAEFCTTI
DDTNLSFEELVTNLCDAVFCTAYRQNNKLKLYFERPTDnsVMLFNFRNIIPDSYKHDL
TFGVMDDYDGLIYEYTDPTDDSRINIYLPDKGAKNPKEVKSvGVRNKWQAHFNAYRIW
NKMRFQRKSITFDAAPESELLVLRDRIAVADYRNGIHQSGEVVQQEGLVLTLSHDVDF
IAGKSYVIYLQMA DGTVDLIPVTPGSAKNKVVLGRLPNGALKLSPDDFVNTIYTVVND
DTKGS LPYLVAkrePVDQFSNTITAINYDERYYLNDKDFIDVPVDDSPiYIRYDQLDI
NLARLYQMQRGDLPTTGEISFVVESGALVSSSSSYRPETRFVYKFDYNSSPPKQEFIA
PAATELPAIDTGEFPDLVVNLTIKGA VVGRGGDGLPHLAFGAWESDPDYNFTKTRR
DGFQGAPGLLNRHskLNLIIDGGTLARGSGGGATPSGIYTGLSYGVQGIPGGAGAPF
GRVMTGQPISSDSQDWRWYFGSYFNVLKITDAEASVPGKGYRTQNDRYGSPLSGDGGN
WGERGTKSTNDGTWNWkyHGTTegQPGPGGPAIVGVAPLTTQLINGGKILQTL"

CDS      19084..19473

/codon_start=1

/transl_table=11

/product="Ammonia monooxygenase/methane monooxygenase"

/translation="MEPVSTSGFTALLKLYGIAIMVTLAVGLVAAVVLMTRMPRSPQE
WAVGLICTVVSslAGGSFIIVKwGLHEWVTDVwGMIALGGFFVCGLPGWALVRWIFN
FIDKQEGKTIVEVIKEFKKARKDIENS"

```

CDS 19473..20060

/codon\_start=1

/transl\_table=11

/product="Endolysin"

/translation="MPPSGGFLHLKETEMNIEQYLDELIKREGGYVNNPADRGGETKY  
GITEAVARTNGFKGNMKDLPDVAKAIYKKQYWDPRFDQVNVISSLVAEELDGTGVN  
CGTGFAKPLLQRALNLLNNQGKAGWPDLTVDGIYGPATLNALKTYLAKRGKDGEKVLV  
RVLNIMQGQRYIEICERNPSQEQQFFYGWIANRVVI "

CDS 20542..22860

/codon\_start=1

/transl\_table=11

/product="TonB-dependent receptor"

/translation="MKPLAALPLIFIAIQVQAEERIAILKPLVFKANALKEKNYVVD  
KEKVESSENTIGDALKNITGIQSTSFGPNAGAPVIRSLSGNRVGVIEGEFINGMNAFS  
GNINIPFDPFIFIEKVIVNKNTDNIRYGGNAIGGSVQIESGLIPKKIEEKPKNLDIVFR  
KGFNDFDVKGFNFNINDQKNWSTNIRYSEYEISSYKIPGNSKAKLCEDQIFSNSGGIN  
SALAASCQKDSRVQHIYNKSSQPYIDKFMTENPDWADGDFSFYTDKPTSIWGGKTYIN  
PKNPEYIPNTPQNTIKKINTDVTPTYFKKLGNSYAQENIGFGTTYFFDKGFIGLSAD  
KKKSEYGVPGFSLQNQSFADSJETLPVGVKIDQNRFLNSNFIQPISSAEEISLNFQQ  
LSNKSGEYVGTAKANEEKIDNQLIELIMKQSSFKGLDGILGFSKLRNIEGSGTQRYL  
PNVSTISKAIFLQEELNIKQFTLNTGYRFERIEHELQDNDFKLARNASNSRIENRKYN  
LNQYFIGGEYKVNFIINLKVDYGISERAPEVNELYSSNVHYSVMAQEEGDQNLKPEKS  
KSLELGMFLNWNWVMQLVGYQMDFENYMYLSHSGVAVQNRLPLKYWKQTDTDVKGFE  
IDLIYDFNLAHIGNIKLGLADLVKNKAVNPTDIRLANDGVYLPNMPTNRYGMFLEWR  
NDSWKGKISSIYYDEPRYLGNVIEVPLSGYNLLEFKIDKKLKIKNASFDIFLNGTN  
LLNEEARPQNSPLKYIAPLPGRAFQLGITMHI\* "

CDS 23142..24527

/codon\_start=1

/transl\_table=11

/product="Phosphoethanolamine transferase EptA"

/translation="MALNVFKFKKICKDVTLNLFNLLLSIWGLGLFNLIGFFKKIHQLT  
PYNGIKSVLFLGATLVILIAAYNLIFQLINWKWTAKIFAILLIFIGGFSSYFVNTLGV  
IISPQIQNMVQTDVSEFTDLISLRFVLWTVFFVILPIFLITQVKFKQEKASRLLLKK  
VFSLVASFAVVGVLFTYYVDFAAIFREHRDLKGMISPQNSISSLMSYYHKKAPKKNL  
PLVIYGQDAHQVQVQKNLPKLMILVVGETARAESFSLNGYAKNTNPELSKQDIFNFS  
QVSSCGTATAVSVPCMFSGMPRVDYDEQLASHREGLLDIAKRAGYQVTWIDNNSGCKG  
ACDRVEQYQIPENLKKKWKDGEYDDILIDSLKQYLATIAKDDDRPRILVLHQVGS  
GPAYYKRAPEAYQPFKPTCDTNAIQGCSQTELLNSYDNTIVYTDHVLSQMILCTRQIS  
QNPYPPIRVLPS "

CDS complement (24489..24935)

```

/codon_start=1
/transl_table=11
/product="Transposase DDE"
/translation="MVGRVKLYISALQLENGELLLVSPQFNANAIQDYALRWEIETL
FSCCLKGRGFNLENTRLTDP RRVKKLI AVL AISFCWCYLTGEWQH DQKKA I K I K K H G R L
SMSLFRYGLDYVQMAIQRLIGFGKKEEFKEILAILRRQNPDRIRVL"
CDS      complement (25010..25579)
/codon_start=1
/transl_table=11
/product="TnpA (transposase)"
/translation="MTHLNELYLILNKYLKWNKSHLKC FALIMLVII LKQTCNLSSAS
KALPIKCLPQSFYRRMQRF FAGQYFDYRQISQLIFNMFSFDQVQLTLDRTNWKWGKRN
INILMLAIVYRGIAIPILWTL LNKRGN S DTKERIALIQRFIAIFGKDRI VNVFADREF
IGE QWFTWLIEQDINFCIRVKKTSLSPII"
CDS      25654..25977
/codon_start=1
/transl_table=11
/product="Phosphoethanolamine transferase EptA"
/translation="MINTLKEISKYQTGLWYLS DHGESTGEHGLYLHGSPYAIAPSQQ
THVPMIMWFSESWKQHNLAQVNCLSQQTQKQLSQDNLFPSLLSLLDVKTQVVNNKLDM
LSQCK"
CDS      complement (26288..26776)
/codon_start=1
/transl_table=11
/product="SEI1-like repeat protein"
/translation="MKKIFLAALATIGLQACTTPYQEMGASGGVEATI IDDNV FQVRA
SVNGYTHKSIANQYALRKAAEVSKSLGCSYFSAINNTSQSYNQ NISKVDAGLKTT PNG
VYYVSSAGTQYKLIKPSRNNTYVCFNEKPNTVLPGLIYNVKYVLGSPMPTGKFKVPNS
WR"
CDS      complement (26866..28239)
/codon_start=1
/transl_table=11
/product="Recombinase"
/translation="MAQHIKFTKSVIDSIPLSEEKQIF YRDTV TIGFGLCVGKTKSYF
AEKMPNGKSKRKVIGKHGVYTLEQARTEAKRLLILMDEGVDPVKQKRD LRASAIQND
ALQKLVPTLSEAYQYYKLRKKLAETSLIAYDGC IENYFSDWKDLKLDQITSAMI DRH
LKLSKASPSRANLASKFLHALFNHTISRYKDESGNKILNIKNPVVIVKEEKAFNKIKR
RKGHVRADQREAWALAVATTYWMGEQNNDFRAYTNQDFLFLALTGFRRSEAESVEWK
NVDLQFGTIKIINTKNHEDLLLPMGDTLWHIMRERKKRAGDNKYVFTDRNGVSHISDR
RAARDKVTENSGIEFTFHDLRRTFGTIANSLAIGSYTIKRLINH TTDDDDNDVTDGYI

```

QVSFDDLKKAMNMIEDV I ISEPVKALIKSRLYFEKNESRNQAQELINHHIQVLNDFKM  
AGQILDF"

CDS complement (28674..28937)  
/codon\_start=1  
/transl\_table=11  
/product="DNA-binding protein"  
/translation="MSRLTKLDRMTHAEKEAAKKEFWAADNQTFPPETVAIVMHVSL  
PWLQKKRCEGGGIPFSKPHKRQVNYMKSVDLAYIEQNKMAHTA"

CDS complement (28938..29660)  
/codon\_start=1  
/transl\_table=11  
/product="CdiI immunity protein"  
/translation="MSESTLWAVAMRPEGYSPPFKQTPAASKEIAERAVERYRKMHEKE  
GNNFFLEIFDDVIKVQKWHGSRKDHKNLFYVESWFSSEPMYQCFDLKTAERVFKFDEI  
VICYKKSAPLVTKSFDEAKLFYGSSETGFKYQIQPIEPPENLFNWFHPDIELFDTIE  
EGAEAYTREQWAQLQMNLRVEIETQLLDYDEIPNIPEDAVVWPNNWKPEPPEQGLFLIA  
AFDSEDGPVLWWANPKAESKEK"

CDS complement (29657..30064)  
/codon\_start=1  
/transl\_table=11  
/product="hypothetical protein"  
/translation="MTGNERIPFESQFKTTEIFKRESAIRKNDILAFSETMNGYFNIV  
TNDAWQLWNKAKAETVPDTPTPSVTLTCAELKEAFDFGAPDGEKDQFQMETEMTIKWL  
QDGYDGEgyycwyadlPEEGCIKLGVSesgaeg"

CDS complement (30065..30280)  
/codon\_start=1  
/transl\_table=11  
/product="hypothetical protein"  
/translation="MLGFMYYLQLLGYVIVRQGMQAMFLTKHYAVPVAVRRITIDYH  
NRLNKPAQQLYKEFVEWTKEEYAEMVA"

CDS complement (31247..32383)  
/codon\_start=1  
/transl\_table=11  
/product="ATP-binding protein"  
/translation="MRIRKMALPIITADQTLVQAIIVLYADPGLGKSSMGFTAeka  
ISFDFDRGAHRTGELRRGAVVQVQQWSDVANLTPQDLAPYKTVVIDTVGAMLECIKTH  
LLLTANNRQKDGSLKLKAQGLANQTFKQYINTLISLGKDVVFIAHASEDQNGDQIIYR  
PDLGGKRNRELYRIADLMGYLT'TVTTGEGKNARVINFKPSPTHAKNSGALGGETGEV  
WVPDLKAHPTFLADLITQAKDHINTLTPAQLAAAKAQEELNWKQSCEEAHAGDLNQ  
LTESLDKEHMYQNMQRQAMLRAKALNCTFDKQRGTWISPPFNGISDQQRDELQNFI

```

AERGLDVKTVCEHFGIDALIQIEAAKLTAVKQEIETLAKTGMTA"

CDS      complement (32380..32703)

        /codon_start=1
        /transl_table=11
        /product="hypothetical protein"
        /translation="MSNFKKHPDGYMSFLGRDDKGLYSVRIGWQVYASNANGSVLYKV
        KDGVKTPLNVFRFQTSYPKVVNELTQEIDFQRRKQLAIKLRETNIPTYDRKAYKQKRG
        FTGSR"

CDS      complement (32696..32986)

        /codon_start=1
        /transl_table=11
        /product="putative Ubiquitin-Binding Zinc Finger"
        /translation="MKDYNCPTCKMIPVDRSKIAGDEVSEFCRVTSKSSARFSSRE
        GIVNCREGDVVLKYRKEIIPLNIRDVSPVDAPSPLTYAFVGTCECKEAEHV"

CDS      complement (32986..33426)

        /codon_start=1
        /transl_table=11
        /product="hypothetical protein"
        /translation="MNVKTFSNKHKVTGVTIAVLVALSSCEYRTANSSVPSNYSYES
        EQVVASEYELLAVKKTGEKSGEAVIRIDGFKLNVSFDFDGVADSYGVAGSDFTTAEIT
        NLAIDSVTDLGKSFNDFTNHDDHKNNINILLAGYIDRNNWLEAA"

CDS      complement (33635..34138)

        /codon_start=1
        /transl_table=11
        /product="Actinobacterial Holin-X"
        /translation="MAKRYLPFYNNARFIALVLVGLFAIFSIIFKYLELNITINLVQF
        SFVLLLPLSQIYLAYKGLDALKLDGLNQSERDRLTSTVDIRSKSSLYVAMLFILVF
        SMYILNLLGLLSAKHLLALILSVGLTSIFSFLAWSDLREISLLEKTLKDRKESREAK
        AKVLSNK"

CDS      complement (34140..35192)

        /codon_start=1
        /transl_table=11
        /product="hypothetical protein"
        /translation="MNPTQYFRAIRREEEIMSKTVVKDKTVHYKKVDFLKGANLGQLLK
        AQLLDKDSFYYKAINRQQFVSATKDDFILINHASSHQSMFFGELIIVESGKAQAVLKI
        DSDDATEFPIKTYLTDDLDDDEDGVDATEVVRKEFIDSVLYFGVIDNHVAIIQSRSLT
        ARTLESYLGWLLGEAAKALPENSALILKDAPNPTVKQKLESTPAKTISISSGIGSTEL
        QPVHTVESSIPAKIDYKIEDNVVDVLKSAFGVDLENLKLEDGLDDANLKLTLTYNR
        KTSKSGQKVIDTVASSMRHNDYVITLEDGKVTADNLKMSGKISVETINNKVYNDGL
        KVQLYNWMTTNINFGD"

```



CDS complement (35199..35414)

/codon\_start=1

/transl\_table=11

/product="hypothetical protein"

/translation="MDNSKRPINQIIARINDAAKHGEALVLTAEVVKILSKDIGDKVF  
IPVLTNEQVVQLVKEGKLGHKINNTKD"

CDS complement (35429..36193)

/codon\_start=1

/transl\_table=11

/product="LexA (CI repressor)"

/translation="MNTLAERLRYAMEVLPPKKIKGVELARAVGVKPPSVSDWLSGKS  
KTMEGENLLRASKFLNVNPSWLASGTGEIQSSTRDKFKQLDIEAFKKKYNISDSDEAL  
LFSTIIIEKPFTPSSKRWWPVKAYSKMGMDGYFTDMGYEGNAGDGYVPTHAGPRAYGI  
KGTGDSMFPAIRNGWYVCDPDADLVPNEFVQVCLKDGRCTIKEFVGINGGVLSSLSV  
NGGERFFFEMDEVESITAITDIVPPSQHRQEHYPYSH"

CDS 36302..36553

/codon\_start=1

/transl\_table=11

/product="Cro"

/translation="MNDAQLIDKLGVTAVARLLGITPPSVSGWKAIPLDKKIRLAVI  
AEDLGLTTRKELFPDNYQDIWIELRPQTTSRNLGSLTA"

CDS 36564..36884

/codon\_start=1

/transl\_table=11

/product="Bacteriophage CII protein"

/translation="MSKVSNELPASASNNESLILQALNTSNQRQVAEKVGIDASTLSR  
MKNDKKNNGLTEIEFISSLLTAIGLKVPESDVYCSPEIAEATRVLHAFTSPEYMR  
ILFK"

CDS 36841..37215

/codon\_start=1

/transl\_table=11

/product="hypothetical protein"

/translation="MHSLHLNTCGFYSNKKPLPAGTGVVRHSNEVDQMNTNNLSEQPI  
ELNSPDFLIGDVVLTKECRSFKSNDLFEVKNKTLTRLWTIKSENHLILVSSKEIRTA  
TVAELNAKRRLTKAEQALAEVS"

CDS 37212..37511

/codon\_start=1

/transl\_table=11

/product="Iron-dependent Transcriptional regulator"

/translation="MNSQFKYKPEYKQTQEIQSFDPALVILNELHDRNRKNLRAKGY"

DENNAAITREEFSQTMAQRFRINQWLAGQIVNSLANADLVQKFGGYVKPKVGVHE"

CDS 37504..38385

/codon\_start=1

/transl\_table=11

/product="Bacteriophage replication protein O"

/translation="MSNFVPNSFQVPNAFVDEVLNKISDAACKIYLVICRKRTRGWNKE  
MDSISLTQFEEITGKSRPTVVKCLNELIKVGLVVEQPSTIHGNTFKLGNDTSVGLVLK  
FPSKNFLPEIYGQTSKNSLPLLVKNFNYTSKNFLPLLVKIFNTQSITIKNSQSNKK  
INKKREPVSEKPKSEKPTFNPRLVELPACVDPELWNNFVDMRISIKKPLSENAVKLI  
LKKLISFGPLANQSLensiIGNYQGVFEPRQNQIQENPQSHNVPEEPGYFTQMYAESN  
RSNVIDVTPVSQDFGGY"

CDS 38388..39188

/codon\_start=1

/transl\_table=11

/product="Replication protein P"

/translation="MNELAPFESFLKELIAAYRTKYAVQFNKNFPVEGKNAVPMQIVE  
QQLAKALVGVTNPQLQRGLALFYASTNTYMPNFAEFAMCMGDDWWSAEKAWVKACEY  
TQISQHKKVTLPDGREQNQEITTLTKFVLDQVYSLIQDGEMYKAKMEFIKIYDEYKAE  
AQLKGKTQAWYQEPILLAQKNEQKVHKPVSNDQAQKHLQSLMERLKINGRKVPVPQKL  
KAKEKEPELKQELGPDPPFDPNPHEYAEMCRREGMPIPRNILKLIDGANI "

CDS 39185..39319

/codon\_start=1

/transl\_table=11

/product="putative phage replication protein"

/translation="MNKFEILAWGLLISFFTAAISGAVVWWLARKELDEKGASHESN  
"

CDS 39288..39728

/codon\_start=1

/transl\_table=11

/product="Ribosomal protein L7/L12 C-terminal domain"

/translation="MRKEPAMKATKLIRDKGLQYAKEIVDSAPDNATEWNEGYEFQCG  
QSVEISPADREKYFVDLVLEKRLVESLKIINDLGGVEKLTAPAFITTDKHVGYTHVRMV  
GNGRLSFLDDFCDFIPDGSISIKRVMTAIRDHESIYGGGESHAN"

CDS 39718..40140

/codon\_start=1

/transl\_table=11

/product="hypothetical protein"

/translation="MPTRYNTGEYSYDLEYHYGDMSASMEMLRARLIELLTPHLSGRY  
VKWREAYFTWFTKCGD SGW MFCVGPHEFHIDGALRRYYSGSIDITYNQKDRYFLVGE  
KKKVKCKACKGFGFIRDDGWHIDKCEMCDAEKGASHE"

CDS 40133..40357

/codon\_start=1

/transl\_table=11

/product="carbohydrate binding domain-containing protein"

/translation="MSEFEGKSGKWAWIEIQKEQQAKVEELQKRLDGALKETQYALQYV  
EEDMRGNHEFLQMAMIRTLKAIEQVLKGGA"

CDS 40357..40758

/codon\_start=1

/transl\_table=11

/product="DUF559 domain-containing protein"

/translation="MSSVSIAEYRKLFPIKKNKKRRSAKQVARQPSVGEVVLATHLRA  
CKIGFEQYKFKHPERKWRADFLIKGSKILIEVEGGIWSGGRHTRGKGYLGDMKEYNSA  
AMMGFTVLRFSSTEQVKSGMALKQIELLIKGGK"

CDS 40769..41521

/codon\_start=1

/transl\_table=11

/product="hypothetical protein"

/translation="MLVEKFDFIELRLAIAQGKAEGKKISKDVVLGELALLSPAACL  
WATVLIKVDFERIAIITPAQKQTETFYSKYDFNFQTERRIEDIPGKVEFVRGEIKSG  
NFFRARNKLAVEIHKEMVKKKFTPTNAQGDLTNLAKGMAEII LRGHV FVKAMCGVCQG  
LGKIETFG LNGFPNGARFCEKCGTGKRPYTLKEKMNIAGIDATKTAYIKSYQKFELF  
GESIVAEWENEIRTRISRSFRFELPDSQETYA"

CDS 41943..42398

/codon\_start=1

/transl\_table=11

/product="hypothetical protein"

/translation="MTQYLMFAENIYNKI KDEELFSHDCIENMNLLMTCIRREIKGTE  
FKLKYNFIDFVELFSRPLDECKVKIDVSLIPPHNSEGEYILWLAGLIEKITEGGPKPP  
PPIKKFIPEYMSLKFELDFLPLNEEKIQNEGKEITDYFNSKLYKATFKK"

CDS 42460..42894

/codon\_start=1

/transl\_table=11

/product="hypothetical protein"

/translation="MDSTEYFWLTRKKEPKTKPKSRPLPAKQKYLEAEATLKEELED  
LAIGFESKFQPIHTKHWRDFDHIVKLRLLLIEIEGGPWSGGRGGKLSNKAWSLNRYDHA  
EEMGYKIERFHPDSILSGYVINWIKSELARIEDGADQTISTD"

CDS 42863..43504

/codon\_start=1

/transl\_table=11

/product="hypothetical protein"

```

/translation="MEQIRFPPTDFIDQAEAAAAIRLTPAPDLKKWVANYLTIGGP
IYNPDHHDHIAELLHDNDEFLAFWASSAYKSKQAMVLGQCEKVMFNVGGWRKARQEQQ
MRDWFGFVPTYLITVDASFCEANDTEFCYLLEHELYHIGVMRDEDEGEIVYSDSSGLP
KHYLAGHDVEEFIGVVKRYGPSKNVKRLIEVAKNPPFVSNLDISKCCGNCVIN"

CDS      43563..44033

/codon_start=1

/transl_table=11

/product="DUF2280 domain-containing protein"

/translation="MATLKEPVKIFIVQSLACRDTQPQEAELVKQEFQVDIDRVQVAT
YDPTKVAGKNLSKKYVELFEKTRDEFDGLIDIPIANKYYRLKQYQRQLEKTRNVKTA
LKILEQAAKDIGGQFTNRQETGKDGGPVQTVNSEIPVPMEDYDKARREVLDEY"

CDS      44023..45450

/codon_start=1

/transl_table=11

/product="Terminase large subunit"

/translation="MSTDAARDKAIRIEAQEDLYFFTRYMFKERRGYKWMQNWHLLEI
CEALMKVYRGEIKRLIINVPTRYSKTEIAVINFMWCFGKNPDCEFIHISYSAMLAAN
NAFQIRTLVQEEAYRKVFPELTLRDDSKAKDFWRTSQGGVCYATGTGGTITGFGAGKL
RKGFGGCIIIDDPKAHEASSKTIREGVIDWFQNTLESRTNSPDTPIIIVIMQRLHEDD
LAGWLLGDRKDGVPVAGNGEVWEHLCLSAIQEDGSALWPAKHNIQKLRIMEQAAPYV
FAGQYRQMPSPAGGFFKPDNIQIVDALPADVVKQVRAWDFGATENEGDFTVGVREAL
GADGFTYIVDVTRGQLGPDNVNKRLEQTAKIDGKKVSVRLPQDPGQAGKSQASSFVKL
LAGYSVIAKPISGDKLTRAQPFQAQVNVGNVRLKGEWNKDFIDELRHFNGTHDDQV
DAASDAFNLHEGFEEAFFADMGFAR"

CDS      45447..46898

/codon_start=1

/transl_table=11

/product="DUF4055 domain-containing protein"

/translation="MSDVTFQHAIEYVKNLPYWQKLDDVCEGEDAVKAKGEKYLMPNA
HDKSPANKSAYEAYLTRAIFYEVTGTTLSLVGAATDPSFKFPPELAHLERNANGA
GLSTYQLAQNGIRHLLKHRYCALYVDYDPVPPARNLAEFKAQKAYPMIHLNLALDVVN
WDSVMIDNQKKLCLVVIREFKSERGADGFSKTEQEYRVLRLQEGNGEYIYSVQVYT
KGEKGNWVGGEKKFPTDYNNGFWTYIPFTFVGAINSEEIKKPPLLPLANLNLAHYRD
SADFQESVFYMGQPQYYAKGVNWEWYDQAKKRGIIYIGAKVLLPLPENGGLGIVQADPN
TLAREAMKDKWEKMKEMGARLIEKSGSKKTATEANSDDAVQHSVLSLCVVMNEALS
AALRWAAKFVTPNVDVLTKDDLMFEISQEFNKQGYLAELARQLFEAALQGRSSFKSWW
EYNQTGMFPKQKYEEELQNVEAEQDGTNLNQVE"

CDS      46900..48003

/codon_start=1

/transl_table=11

```

```

/product="Minor capsid protein"
/translation="MATDIKKLFEVLTQHQAALYRASSKTVNELLALFNDDTSKMLSK
LRDLLDELNESEKVALAGGKYTTNLREIRDLIAQWFASVNLALPEAFVSATALAVY
EANYVAKLYGAKINKPDGEKLFSAKKVPLAGGALVDDLLSRIAESARQKVEYAIRDG
INSGKTNQEIIVQIRIRGTRKRLNYEDGILNGTKTDIERTVTRTVRSHVANQAYLNSFNQIG
FEYVRFVSVLDGRTSKLCASLDGSVWEINDPAKRVPLHPNCRSILVPVEKDGQLVGE
RPFVMDERRVKDIPKEERSQLIGQLDANTTFKEFFKKTDDFFQREWLGPKRFKLYKDG
KFDFDKFFDPEGRFYSLDDLRLKLEKAFKKLGL"
CDS      48012..48440
/codon_start=1
/transl_table=11
/product="hypothetical protein"
/translation="MLYFLKHQNLNMYKTIAFVCLTLISITCLAEPSQKYLKEYDRLS
EALESAMANAYSFDPATGQVKQATQGLEAKNNLCRAAQAKLNLTTFLKDNLEESKELY
KSIDGAETLDKNYLSGQQQEQQNLVSNLKKDLVGTGFNCE"
CDS      48539..48781
/codon_start=1
/transl_table=11
/product="hypothetical protein"
/translation="MSESKVRHLVLKRVSDKSSHLALCDEETGIPLAGLTAVKMNCV
FEGPATITATFDVGGPQGIRLVGDEPRQKVWSAKET"
CDS      48999..49190
/codon_start=1
/transl_table=11
/product="Occludin homology domain"
/translation="MPSPIIQYFYEHLPPEHLQQVSKPIGDLARQMDEQLPDGPEKST
GLRKLLEAKDAFVRQALSK"
CDS      49304..50071
/codon_start=1
/transl_table=11
/product="Telomere regulation protein Stn1"
/translation="MKLKTVTIDGKVYAEVDGDKPIYIHDDGKEMPHDAPHSVATIAR
LNNEAKTHREAKEAAEKALKAFFEGIEDPAAAKKALQTIQNLDDKKLVDAVEVEKVKA
AIKAVEEKYAPIVAQRDALEASLHKELIGGGFARSKYIQDNIAVPVDMVQATFGHHFK
IEEGKVVAIDPNGEKIYSRVRPGELANVDEALESLVGGYQHKDLILKGGKGTGGGFQG
GGKGGAPTGMKRSEMSVSQKADYIKEHGND AFLKLPN"
CDS      complement(50449..50619)
/codon_start=1
/transl_table=11
/product="hypothetical protein"

```

/translation="MRPNLSPNFRIPRVNALRPSTTILPFATMSGLEIAAFKEAKLY  
SNRPATNASARS"

BASE COUNT 16086 a 9005 c 10650 g 15188 t

ORIGIN

```
1 tcgaaagggtg aaaatcctga ccttacatta cttggttcaa gcgctaactg gatcaaatat
61 gcaaccagca acaaaatgac agcaggtacc ttacttgatt tatcgggtac agcgacaact
121 gggtaaaacc taaaaattaa aacctaaggg ggctaataag ccctcttttt tattattaag
181 agaaaagcgc catgaagatt atctatacac gcattgcagc agcggctgca ttagagacag
241 gcattattgc taaccctgac tattatgaaa acccaaattt gaaagcaaaa gaggtaatta
301 ttacggtaa ttatccaaag attcaaaagg attatgaatc tttggaagtt ccagttgaag
361 ttcgtaagtt ggaagtgcc aaaaaacga ctttgccac agtaaatgtc gcagtgggaa
421 ttaccctga acttcaagct gtgatggatg atgcaaaagc tgaatgtgaa aaggtagttg
481 aagaaaacac tcagcttaag cagaaaattg ccatcttaga gcaggccggt ggtaaccagt
541 cagagttggt atctgaaaa tcacgattaa aagatgcagc agtcttagca gataaagctc
601 tcaaagatgc tgaagctcaa gtggtcggta taaaaactga atttgaagct tttaaaaatg
661 atattcctgc aatgcaggca cgtattgctg aattggaagc tggaaaagcg gcagaaaacc
721 cagctacaga aacggcagct aatgattttg aaaactggc aaatgatcaa ttaaaagagt
781 atttggctag taaaacatt ggttacaagc cgtctgcaac aaaagcagaa cttcttaaat
841 taatcccgaa ggaataatgc aatgagcttt attactgtag atgacgcaa ttcaattttg
901 ggcagcgatt ttgcaccaga cagtgataag gctcgtctgg tgaagctggc aaatgtgtgg
961 atgaaaaaca gaattggttt tgtaccagat ccaattgatc cacttcttaa ggacgcggct
1021 tgtgaaatta tcaaaggaat tctggccaaa gtaatttata acggcaaaga gcagcagttg
1081 aagcgtaaga aagttaaggc tgattctggt gagtcagaaa aagaatttca agacgcatct
1141 gaagcaatct ctagctttga acagatagca attgatttta ttgattcact tgatttgaaa
1201 gatccaaatg caagttttaa tggctttggc ataccacttt acagggcatg atatgggctt
1261 acgtgacgaa attcaggcag acattgctga agcatttaat gatgatttag cagatgccat
1321 tcataccttt acatgtgagc ggatctctaa aacgaattgg gatcctaaaa ctgaaactta
1381 tgttgaagtt aaagaaaact attctggccg tggcgttctg tttggctcat acagtcaata
1441 tgagatccaa aacttggag tactggccac ggataaaaag gcaaccgtgc ttcaaaatga
1501 agtaactatg actccaaaaa ttgaagatga atggttaact gccttaggct cattccgggt
1561 aattaatatt caacaggatc cagctaatac tatttgaaa tgtcagcttc gaaaagtga
1621 ggggctaaaa tggttaatcc tgattatggt cctgaatgg atatctcgcc ttttcaacat
1681 gtgcagtaca cgcttgctcg aaatcaacta cacatggatt tgttatttga agatatggat
1741 aaggccgatc aatttttga tatgggagcg gatgcgcaag ttagtacttt ttctgatgg
1801 gcatatgcaa tcgtccaaat tggatgacg gcggataaag accgaattca agtttatgga
1861 ttgcttttac atgaagctgt tcattgtctg caaaagatta aaaagctcat gggatgaacga
1921 gaaccgagct ctgagtttga agcttattca attcaggcga tcgctcaaga cttttttaa
1981 atgtatgaag aaagcgaggt gaatgatggg atggaagggg aaaaagccaa ctgaatttag
2041 ttttgatgtg tctaaagcag cagaagacca ggtgaagcat attgttatgg atactgtgca
2101 atccttagtt aatttaagtc ctgttgatac tggagcatac cgtgcttcac atattgtttc
```

2161 gggttgatct gctgatttcg gcgtgcgtga acctgaaaca aaccctatta acgacgcagc  
2221 gattcaggca atgaagatta agttaggtaa tttggtttat atccagaaca ataaagctta  
2281 tggaccgcgc ttagaaaacg gctggctctga tcaagcacca caaggatatt atggcctcac  
2341 gtttaacttt atttctcaaa agtacggtgg ctaaaatggc aatgacttta gagcagacaa  
2401 ggcaagctat tattgatcgc atgcaaagct ttacgggtat tgctcaagaa cggattcagt  
2461 atccaaatgc acctgacttt actgttccaa caaaaggtgt atggtgccgt ttaacgattg  
2521 cagggtggccc gagttttacc tcaggcattg cagataagcc atgtacacgc cgtaccggta  
2581 atatcatgat ccaatgcttt gaccgattac atactggaga gaaggccgta acggttctaa  
2641 gcgatgcatt gctggctcat tttgaatatt tcacaatcga acacttagaa tgtttgaatg  
2701 gccaatctat ttatgcggtt aaagatgctg atttcattca gtataatgtg agcattgggt  
2761 acaaggtgaa ttgatatgtc atgtatgctg actttagaag aaatcgaaat taaacggcaa  
2821 gaactggaac ggcattctga agatgttatg tctgttgagt tgagcaaatg gcaatctgaa  
2881 aacaagctat gtgtttctga tgtgaatata cgcttggtta atgttgtagt tctcggaggg  
2941 cctaaacata acgttggttac tggagtaagt gtcgatttag ataatgagct ttgagttcaa  
3001 gaaaaagcta ctgcaaggcg attatTTTTT atgacctcag catattatca tttgtgatta  
3061 cattctgtta cagtaatgga aatttataac aaatggtaaa acatgaaaaa atcaacttta  
3121 ggctgggggt ccgcaggatt agtagcttta gggatttttg gttcaggcaa tgataactct  
3181 ccaaaacaaa cttcagactc agaaaatgcg cagagtgcag tagaggaagt tatcgaatca  
3241 aaatatatca aactaattc tttaaatatt agagataaac caaacggtca agtagtagga  
3301 aagttaggac gtggggaaaa agttgatatt tatgagatga aaggaaaactg ggcacgtatt  
3361 tccttaaatt cctcatcacc tcagtgggta tcaacaaagc tattatgtga aacggatggc  
3421 tgttttaaac aaaagtctcg atcaaccacg tcaaataatt atcaggcctt aaaatctcat  
3481 cctcatcatt ctgaaagaaa acagaaaaaa acctactacg atagtgattg ttcattgtct  
3541 gtggtggatt attgcgtggg tcctagaggt gggcactact gtattacgag tggaggaaac  
3601 aagagatata aacctagata ttaattaatt tgaattatga gacctccatt ttgagaggta  
3661 ctttatgtct taatcactac cacctcatcg gtggtttttt tatgtctata ggaatcactt  
3721 atgagcaatt ttgtatttaa gcgtgggtgac actttcaact taaatcttca gctagtgtat  
3781 atggatgaag ccctgcaata tccaccagat gatgtgcgcc gtgcaattga tcttacaggt  
3841 tataccttca cttcacaggt taaagctctg gctgatgggt ctactgtggc cacattaact  
3901 tgtactgcat taagccaaag cacacagaaa ggggtggctga acattaaatc tagtgcaagc  
3961 actgcaactt ggcctttagg gctgtgtcag atggatatta aagctgtagt tagtggcact  
4021 acacagcaca ctgaaacttt gactttccaa gtgattgacg gagtaacagc ataatggcaa  
4081 atcttgTTTT taaatttagt tgggatcatc ggccattccc atataacgcc tcacagggca  
4141 agcggcagtt tatgttgcca tttgcgtcag gtattcccaa tctggcacc cacttttctc  
4201 aagtagttgg tactgcagct atctctcaag gtggaacggg ggcaactaca gcggctgggtg  
4261 cacgagctaa cctaggcgca gctgcaagtg gggtaaatag tgatattagt gagcttaagg  
4321 gacttacaac ccctttatca atttctcagg gaggattagg agctgataat gcacagacag  
4381 ctagaatgaa tttgggggta ggaactgctg ctgtactagc gtcaacaaca agtcaatatg  
4441 atcctacgcc gggacgagca ctaagagtcg gtgattgggg gataggggct gaaggttctc  
4501 gtgtatctga tatggttgct cctcttaata atggtttttt tcgaacagat gacactttaa



4561 caaatgatac tggtaatagt attggtcctt atggtttctt ttactactgt acccgacgct  
4621 caatggggtt atatacaaat ggaagtcatt catttcagct tgggaaagct gcctcatatt  
4681 ctgccttgaa gtatcgattt aataatagt gtacttggtc taattgggtt aatttattga  
4741 ctgcacaaaa tactacaact gatggaaatg gttttattaa agccgcttca ccagtcgtta  
4801 agctttttcca aagtcataatt gagctaaata acgatgctgc caagcaaccg atcacttttg  
4861 acaaattagg cactgggtgac tatctgatta agggctcttt aggccttgca caggaagggt  
4921 ggtatatcga agtacctaag gatgccaacg gtaatacgg agtagcagtt gaatatcaa  
4981 ccttagaaaa tgggtgatctt tctattaaaa ctataaacg taagtttgat gtggaaaagg  
5041 cagccattgt agctgatctc gaaaatccac ttgatattcc agaaggccgc tggattgata  
5101 tccgtctgca tgaagaacct gaaccagagc ctgaagagcc gttgagtga acaccagtgg  
5161 atttcagacc gactaactta tctcaggcag ttgctgcagc catgaatggc gtggaaccgc  
5221 cagaaatctc agaaacagac gaaacacttt aataaccgcg ttaaacagcg ggttttttat  
5281 tgcctaaatt ttggagaacc ataatgagt tcaggcgcaa aaattcgatt atatgcttgt  
5341 gaggaagcag ttttaggaac aactcctgca aatccagtct ggtacaccgt tcgccgtgtt  
5401 actgatagtt tgactgaaaa tgttactact gaagatagca gtgaagtagt tgattcacgt  
5461 tttcgccaag gcgctgttgt aacggaagcc gaagtaactg gtcaactaga gtttgaatta  
5521 tcaactagga cctttgactt attcttaaat gttctcgctt tcaataactg ggctgcaaat  
5581 gctttaagtt ttgggtggtg agtacgtaag tctcttacct tggtaaaagt ctttgaagat  
5641 attggtcaag tctttattta tcgtggtatt caagtgaata caggtgaaat gacgatccag  
5701 accacaggca aaatcactgg taactttggt ttagtaggta gctcatttac gcgacagcag  
5761 gttaatcctg ttacaaatcc tattccagca tcgactcgcc ctctggtgag tatgccaaat  
5821 gttgaaaagc tacttattaa tggtaaatca attcagggtg aagcttgtct gcagacactt  
5881 accatcaact ttagtaataa tctggaagcg atccgttgta tcggttctgg taagtacacg  
5941 cctgagtttt acttagagaa aatgatggat attggcgtaa atgctaattt catgttttca  
6001 gcaacatctg cttcttggtt tgatgctatt aaaacccgtg atgtatttac attgaccttc  
6061 gatattacag ataccaaagg cagtaagtac tcgtttaact tcccgcaact tgaagttaag  
6121 gaagcaaatc accctgatgg tggtagcgat gacattatta caatagatat caattttgcc  
6181 caagtgcgta ccagtcacac gattgtacgt gctcttgtgt aatcaactta ttcagtaaca  
6241 aagcctatgg aaacccatgg gcttttttat ttctaaaaat tagagggtgt tatggcttta  
6301 aaagtcggaa ttattaaaag ctacagcgta tcaaaatggt gtgaatacaa ggggtgctgat  
6361 ggcgatgtac aggtgagtt caaagtccgt ggtatcgctt ataagccttt tcaggtagct  
6421 attgaacggg caggaaacca gatctcgtct aaaggctatg atgtgatggt caaagatgaa  
6481 gatgccaagc tttaccacga gcttttaatg gatgcatgcg cggccactt aatcgaagac  
6541 tggaaagggt tggatattgc cgaatcgta gacggtaaaa ctgttgagtc cgaaaagcca  
6601 tatacacctg agaatgcctc aaagcttctt aatcttggtg atattggtat ttcaatctgg  
6661 ctattcatta aagaacaggc ccagaagatt caggaagacg cagacaagga caaggcttta  
6721 attctgggaa agtcatggag ctctacaaat accaaaaaac gtatgcgtcg aaaacgccgc  
6781 acgaaatcga gcaaatcaag ttcttaggcg gccgtattcc ggatccgcca gaatattcgt  
6841 atgcggctga ttcaattctt tcggcattta gcactatatg tcgatccaga cgttatgagc  
6901 aaagcatacc gttatcttta gatcagcagg ctatcaatgt ctatgctgag cataatgatt

6961 tgccagtggc tgctcatatt tttaatgact gtatTTTTgc gttggataat ttgtTTTTgg  
7021 aggagtgcc taagaagata tcaacaaaa gcaaaggtaa gtgaccaaat taggtattgc  
7081 cagggactga aaagcctaatt ttggtcaaaa cgtcaaaca ttaagcagtt gctcttaaac  
7141 gcgactcaaa ataacgcagt cgatgttaca aaatacttga tctggattga cagaaaatta  
7201 cctttaaggt gttgcgcgtg attatcaaat gatgaataat caccttaccg tcaatatttg  
7261 acggttcagc attcttttac tctttccaag aaccttggtg ttgcttgta tgtgtttaac  
7321 attaaactgaa gctaacaaaa aacttagagc atttgctaga gatactagca aaatcaagtt  
7381 aactgcacat gcaaaagaaa gaatgaaaga acgctgtatc tctatgaagc aaattatttg  
7441 ctgttttgag catggagata ttactgaggg gccgtaccca aatactcgtg gtgattgcc  
7501 gttaaagtgt tctgttcgca ctgcaggcga atacataaca acagctgttg caatcaagca  
7561 gagcgagaac ggtgaattct cagtagtagt cactacattt agagagtagg ctaaattatg  
7621 tatcactatg aagaatgcgg tctgagcaat atttggtgc gcaatggatt tacaattgaa  
7681 aatgatgaag actatggtga actcgtatct attgaatctg ttcattgagc tcataatgcc  
7741 attgggttgt tcttaattac gcaaaagcct gacttgaatg gtgaggaaat tcgtttttta  
7801 cgtaagaac taaacttgtc acagaagaat cttgctgggc ttttaggagt cagtgcgact  
7861 agtattagac attgggaagc tgatcgcggt ttaattggta aacctactga gctattactt  
7921 cgtgcattat ataaagagca tgttcaaggt gatggcaaac taagaagtat gattgagtca  
7981 ttaaatcatc aggaacgaac tttagtacca agtgaaatta gtttttcata tggaaataac  
8041 cattcatggc atcaaaccaa ttgtgaaata gcttagttag ttttatttga tagaaaccac  
8101 cttcggttg ttttccttta tgtgacattt agtaaccagt ttgttaaagt tagtacactt  
8161 tataacaaac ggtgaaattc atgaaaaaaa tattggctgc gggtttaatt ggtcttgggt  
8221 tgggtgggtg cgctactcca gcctataatt atcaagctat acctaaaaat ataagcaaac  
8281 cgccaattgg atcagttaat aaagcatttg taggggatca aatgcttgaa cagggaatgg  
8341 tgggtgatcg tgaagttcta aacgtccctg aaaatattaa aattagtttt gcttattcac  
8401 ttacttcagg catttactta aaaacaggca aaaatgaaaa agggcaatat tttcagccat  
8461 tcaacactgt cagtgggtgg gggatggttc agaaaaaccc tttagctgac ccatttaaag  
8521 tagttatggt agatactgaa ggtaagctct gtgtagtaac agtatttaat gcaaaaaact  
8581 gtactgataa acatcaagct actatgaaga cagtagcaat tgcacagat aattccttcc  
8641 aacaaacatt aatttatagt ggaaaatttg gaaataaaa taatgtcggg taccgtgaat  
8701 tctcaagtaa tcaagcacgt cctgcattca ataattgatg tgaatatgat ttaagccaat  
8761 ctaagcaaat aggttataaa ggtgctttat tggaagtaat tgatgccact aatcaagata  
8821 ttacttaca agttttgaag aactttaaca aggtagatta agatgagtgc accacaatat  
8881 aaaccaatga gagaaagtga agtttgaat gctatcgggt ggggtgtaat agctcttggc  
8941 tttatcgag gttttttatt tattcttgca tttggtcgaa ttgaagtagc ttcttactat  
9001 ggtaaagaaa cggtttggtc tggagttagt atagcaacag gaatcggaat tatatttaat  
9061 ggattccttg caggctactt atttcaaaaa gtagctagta ttcttcgtta ccatgagaat  
9121 aaataatatc ttgcataagc accctaggat gctttttaaa attggtttaa ctacctgct  
9181 tggtaattat atttaactta aaaagaacta cccactcatt gagtgggttt tttattgcct  
9241 agaggaaagt aaaaaggcac aagaatcccg tttggtcatt gttattgatt cgcaaaatgc  
9301 tgaacgtaat gcgcgtaatc taggcaatga acttgtagc attgaacgta aaggtgaatt

9361 tgcataaag tctatggaca gcttgtctgt agccaccaga gctttagctg gacacatggc  
9421 tggtttatta acagtaggtt cagccatttc aaagatggat acatatactg gattacaaaa  
9481 tcgccttaag ttagtcacta acaatcaagt tgaactaaat aaagcaacgg aagacacttt  
9541 ccgaattgct caaaaaacct attcagcttg ggattctgtg ttacaggttt accagcgttt  
9601 tagtgataat gccaaaactt taaacctcac aatggatgac acagcacgtt taactgaaac  
9661 agtttctaaa gctgtagcaa ttagtggtgc aagcgagaa gctgctgatg cagctttagt  
9721 tcagttcggg caggccttg ctagtgaac gttgctgga gaagaactta attctgtaat  
9781 ggagcaaacc ccagcactag caaaggctat tgctaaagg atgggtatta ctgtaggtga  
9841 attacgttca gtagcagctg aaggaaaaat tacttcacaa gaaattgtaa aagcgcttag  
9901 aaatgtagaa tctgatgttg atgctctttt tgctaaaaca gatatacaca tcgggcagtc  
9961 tctcacactc ctaaacacg agatcacaaa atttggtggc gaagcaggta agggaagtgg  
10021 tgcgagcag gtattagctg gatcagttca aactcttgca agtaatttag atttaattgc  
10081 tgatggggct ttagtagttg gtattggata tatcactcgt gcaattttga tgaagagcgc  
10141 tgctattaaa gaggaatgg cttcaacttt agcgagccgc caagcatctg tattaatgc  
10201 tcaagcagaa tatgcagaag ctaccgctgc tttgaatgca gcaaaagctc atctcgcaa  
10261 tgtgagcag acaaatgcag aaaccaagc taaatttggc gcaacagcgg cagcaactcg  
10321 atacgcacaa gcacaggcag cagtaactgc tgctacaaat gcacaaacag cagctcaaat  
10381 taagctaaat actgcaactt caattgcagg gagactagct aaagggcggt ttggattaat  
10441 tgggtgggtg gctggagttg caacattagg agtaatggga ttagcggcag cctattctta  
10501 ttttaataat aaggcagagg aggcacaaag aaagcttgct gaacaagcta aagttgctga  
10561 gaaagctgat gaggagttaa aaaaattaac tggcaatgat aaggctaaag cagttaatga  
10621 ttttaactact gcttttaatg cacaaaataa agcattagag aaatcatcgc gtgctgtagg  
10681 gtctgcatta attgatatcg agaactatgc acgaggaaat agggaggttg aaaaaatttc  
10741 ccaagaagcg agaactggaa ctatcagcta tacagaagcc attgaacgct taaataaaat  
10801 taagttgcct acagatctat atgaaaatct gaaaaaacag gctgagcagt atgatgacaa  
10861 tgcataaaa gcaagtttat cagctgagaa acttaaatta ttaagagttg aagtgaact  
10921 tggaggtaat gaagcacaaa atgcggcaat tcagcatcaa aaacaagcgg atgcttttagg  
10981 aaatactgct actgaagcag aaaaggcaac taaggctttg caagattatc aagccaagca  
11041 aaaagatagc gttattgatt caatctataa atcaggttgg cttgataaag gttacactgt  
11101 tgctcaagct aatgccattt tagaactgca aaaagctaaa ggaatgagtg caattttgct  
11161 taaagatgaa attgatagcg cacttagaaa tctcaagatc atcgaagaac aacaggagcg  
11221 agaagataaa ttaactgaag ctaaaagaaa gcagacgcag gaaattgaaa aacaagcaaa  
11281 acttactaaa cgcttggtcg gtatttccgg tcaatccgg attggtactg gtccacatct  
11341 tgacgtccga tatggtggct cattgtcagg tcagaaagt tctaataaac atctggctcg  
11401 attacaggcg ggaggaaaac ctttaacttc ctacaagatc agttctaatt atgggtccacg  
11461 aaaagcccca actaaagggg cttcttcatt tcataaagg attgattttt caatgcctga  
11521 aggaacacca atcacgacca atgttgctgt gaaagatata aagacatggt atgacagcaa  
11581 gggaggtggt tatgtcagtg aagtatctt tgaggatgga gtgtctctta agcttctaca  
11641 tcaatctccc aagatgcaga gcaagggtgaa aggtggtgca agtaaggaa gtgataaagc  
11701 agctggtgat attcaatctc aactgaacg tcaacaggat ttgcaacggt cacttgaaaa

11761 tgagggtggct agtgaagtcg gacggattaa caataataga aaggcaagac tggaggatgt  
11821 tgataaagca aacttttagcc cggaacgtac tgcagaaata aaggcggaata taaatcgctg  
11881 tgcagataat gatattgcta tagccaaaca agcccttaga acgaaattgg aagactataa  
11941 ggagttccag aaaaccgagg aacagttact agaagagtcc tttaaccgta aaaagttcaa  
12001 tgcagctcat gaccttgaat taagtaagtt tgagcagaag caagctgttg aattgctgga  
12061 acagcaaaaa cagcaagagt tagggttatt aaaactagct caggaacagc ggttgtttca  
12121 agcccgttta tctctgcttt ctgaaacgca agccatgcag gaacgttaca gactcgaacg  
12181 ggaggaaatt cttaagaata ccaagctttc tatagaagag cggcaaaaagc taatcgcat  
12241 atctaagcc aatcaggata aagagacacg cgataaagtg aataatgctg ttcaaaactg  
12301 ggggtggtatc caagcgata tgaatggtac cggagaattt ttcagacagg atcaggaacg  
12361 atttagccgt ttaaatgctg caaatgattt agcagatagt caatttgctg ctactgatct  
12421 tgatgaaaaa aatggtttag atgttctaaa tgcacacatg gaagcaggac tcatcaagca  
12481 acaggacttc gaaaaccgga aaacagctat cattcaagct gctcaggacc aacgcaatca  
12541 gatcgctgcc gaatatgctc agaatgctca ggatattgaa gataagtatc accaagatcg  
12601 attgaatgct caaatgctc ttggtggcca aatgatgggt tcaactacat cgatgtttgg  
12661 ttcaatgttt ggcgagcaat caaaagcata caagatcatg tttgctgctg ataaagctta  
12721 tgccattgca gctgcaggta tttctattca gcaaagtatt gcaaaggcgg ctagtgttgg  
12781 tttccagca aatatccat taattgcaag tgctattgca caagggtcaa gcatcattgc  
12841 aaacatccg gcaattaaag atcaaggctt tgctgacggt ggttacactg gatcagggtg  
12901 gaaatatcag cctgctggta ttgtccataa aggagagggt gtctgggtccc aagaagatat  
12961 taaacgctgg ggcggtgttg gcttagtcga gaaaatgcgt aagagtgcaa accctgaagc  
13021 ttttctcaat aacaatgcct tggcagatag tgtcatgcgc cgtgcaatga tgagctctag  
13081 tgcctttata gaaagccaaa agcaggctga catctttaat caaccggttc aagatactca  
13141 gattatctat aagggttaata gagacacacc taaattagct tcttctggaa atttagactt  
13201 attccatgat ggcaaggctc acttctcatc caatggttta gttcaggatc gttcaaatct  
13261 ggatgatgtt caggacttta ctttaggaag tacttcacgc cctcaagctg agatgatgcc  
13321 ttcaattgag ccagcttcac cgacaatcaa tttcaaaatt gaagtgatta atcagggtgag  
13381 tggggcgaca gttgaagccg aacaactgga cgagcaaaca gtccggatca ttgttaaaga  
13441 tgaactggat aagcagcttc caagaacggt acctaagctt gtaagtgatc aaatcgcaaa  
13501 tccaaactca accattagtc ggtctttgac tgagaatacg acagcgagaa gaaatcgtag  
13561 ttaataatct gaaccctttt cggagggttc attttcataa tatttaaatt tcaagggtgat  
13621 agagtctgtt ggcattaaaa ttgatggta agacatgaaa aaaataattg taatttctac  
13681 aacactttta ggccttacgg gatgtgccat tctgcggtta aataatctcg taagatccac  
13741 aaatatgtat caggatgatg tttcgggaaa tactgcaaat ttaagggttt atagaagtaa  
13801 tattcccatg gtgcagttct atattactta tcaaaataat gagggtgaaa aaatttcaaa  
13861 aaacctaata actaagcaga tttcaaataa ttaacaaaag tatggctcta tgcagtagcc  
13921 caaaaaatta aatatgccta aaccacaat cagtttaaat aatgggtgaag agttttttga  
13981 gtttaaagta cccgcaata agaagttaac tttcaggctt acttctgtta ttgggtcaac  
14041 tactatgtat agttgtgatg taaaaatgga ctatcagttg gaaagaaatg gaaattatga  
14101 attgatccgt ttaaacaga tcaaagattt tgtgaatcca gctttactga ctgaaccatc

14161 tcaagatgaa gcctactgca agttttagt aaaagagatt tttgaagatg gtaaagaaac  
14221 tattattaaa tcgatttctt aatgttaa ataatctaa ataatctaa  
14281 cttatttcat caaacacct ttcgggtg tttttatta cctgaaggaa agttatgtac  
14341 aagttaaagc taaatcctca gaccagcggc tatggcgtaa caccgggtga tgatgtgaaa  
14401 cgtcagcaga tggatggcgg tcgtggcgc tattacatcg atgtgaaacg taacagccac  
14461 attgttgatg tgaactggaa ctttaagtaa accgatttca ataaaatgat ggctttctgg  
14521 cgggtctacc agaacaaacc agcctcattt tatgcggatt tggtgattga tcagggaaca  
14581 cgtcagcaat atctatgcaa tttcattcca aactcgttca agaccaatga agtcaacggc  
14641 aacttatatc gtgtgaacgc gcagctcgaa gttgttcaaa accagcctaa cctgaatgcc  
14701 gatatagcat taattaaaga ttgggaggtc taatggataa cgaatatgcc aagttctttt  
14761 tcaatcggaa agttgatgtc tatcaactgg agtgattga gctatcacat cttcttttta  
14821 tgaatactta tcgggtagtc cgtaatgatg accgaggtgt ctatgtacaa cataaggaag  
14881 gatccggtca ggtctattat gagttcttgc cagtctctat acaaagatcc ggaatgcttg  
14941 gtgatctgga ccagacatta accgtttcta tctctggtct aggtgatgtg atgcctgatg  
15001 agtttgaacg ggtaatcgaa gggcaatc cagatgtaa gccaacgta aattaccgga  
15061 tttacagttc agacaatctg aactctcaa tgttttattt acttggaactg caactctcaa  
15121 gtgtcgccat gaaccataaa gctgtgacat tcaaggctga atcaccacga ttaaatacca  
15181 ctaaaactgg ggacatTTTT gcaactggatc gctttagtgg tttgaagggg gctatatgaa  
15241 aagtcgatgat catttgctcg ataggcaata tgacgaggat cactacaact gtgttcactt  
15301 tgttcatgaa gctgcaatgg acctatatgg catagatcgg gctgaagcgc ttgaactctt  
15361 tatgcagcct aagggcacaa ttactttttt atcttcacgg ttaaaacttt taaatccgct  
15421 acccatgccc aagggaaggc gcatagtcgc ctccatccg agacaaagaa ataagcccc  
15481 gcatgtgggg cttttctgtg ggcaaaagat tcttcacctc atggaaagcg gagtcaacta  
15541 tttgcctgaa gaggttgtga tggaaatggg gtttaatcgg gtcagttatt atgattaaag  
15601 ttatttataa aaaagacgct ttgtctgaag aaaagacaat tgagcaggct caaacattg  
15661 ggcaatggct cacttcaaaa tatgaacata tgctgagca tgtccgtatc tttcatacta  
15721 caagcaatat ggatcatgcc gaaatttcat ttgcgaatga agtcacacca aagaatgcac  
15781 atgacttaaa gcagcttgat ttcttaccgg gcacttttat cgtagttgag aaccctaaat  
15841 gggtcggcgg tattgtttcg attgtgatta gtattgcgat cgcattttta atgccaacgc  
15901 catcaatagc acaaacgact caaaatacta accagtcttc ttcagcaaac aatgaacttt  
15961 ctaaccggga aaacaagatc cgggtgaatg gtcgtattgc tgataactat ggagctgggt  
16021 ggaatactcc cgacctaatc gcagtacctt acaaggata tgaacaacac gttgaagttg  
16081 agcatgtagt gggctgtatt gggcgtggac actataaaat caatggagct tatgacgggtg  
16141 aaaccaatat tgctgatatt gctggcgc atgtagaagt ctttcgacca ggtgtagata  
16201 ttgtttcagg tgagccatat ttctcgcttg gtaccgaaat taccacgccg ccactaacgg  
16261 ttcagcatca aacttctgtt aatggccaag ttttacgtcc tgctgataca caatctttag  
16321 aaggtagcaa ctaccttcat tttgcatatc caaacgagat tcttcgggca acggcaaaaca  
16381 acacagattt aaccactaag tttgtaagta atgaccgcgt agaaatcacc aatgcctcat  
16441 tcacgtttaa tggccagact tttgatttaa atggtaacta tagcgttcta tcggtagctg  
16501 atgaccgtat gacgttatca aatccggcgg ccgttaatgc taactgggta aagcttaaag

16561 agttaaataa ccaacaaact gcagctttgt caccaaagat cagttcaata ggtgaaaaat  
16621 ggattgggcc attcattctg gacaatgttg aacgtagccg ggtgctgtgt aattttgtgg  
16681 ccaccaatgg actttatacc gtttcttcag gtgggtatca ggccgctgtt aatgtcacga  
16741 ttgaagttga agtaacaccg gtaaatgaat ctggtgcagc gattggtaat ccgatgctga  
16801 agcagatcat ttgaaaggt tcggcaaagt cacgtcagac cgttggtgca acacttgata  
16861 tggtcacgtt tcaggggctg ttagtggtcc gtgcacgccg tttaactccg actccgacag  
16921 tcacaacagt tgttgatgaa gtaaagtggc aggcgcttta cgttgcttat cctttacaaa  
16981 gcacagtgta tgaacatgaa acggtttttc gtgcgcgtac ttatgcaacc actggagctt  
17041 tatctgttaa gtcccgcaag atcaattttg atcttcagcg aatggtgccg acttataaaa  
17101 acggggcaat gacaacagag ctatatccaa cgtctagctt tgctgatgct ttggtatcta  
17161 tggcactcga tgacaagatt ggccgccgtt cgatcgatga gattgatctt gaaaacatct  
17221 atcggaccta taatgatgta gttgattatt ttggtacgcc gctagcggct gagttctgta  
17281 ctaccattga tgatacgaat ctatcttttg aagagctggt taccaatctt tgtgatgcgg  
17341 tgttttgtac tgcatatcgg caaaacaata agctcaagct ttattttgaa cggccaactg  
17401 ataactcggg aatgctgttt aacttcagga atatcattcc ggatagttac aagcatgacc  
17461 tgacctttgg cgtgatggat gactacgacg gactgatcta tgaatacacg gatccgaccg  
17521 acgatagccg tatcaatata tatttaccgg ataaaggagc caaaaaccca aaagaggatga  
17581 aatctgttgg tgtacgaaac aagtggcaag cgcatttcaa tgcataccgg atttggaaca  
17641 agatgcgctt ccagcgcaaa tccattacct ttgatgcggc accagaatca gaattactgg  
17701 ttttactgta ccggattgct gtagcggatt atcgcaatgg tattcatcaa agcgggtgagg  
17761 tggtagacga agaagggtta gtccctcacct taagccatga tgtagatttc attgcaggca  
17821 agagctatgt gatttatctg caaatggcgg atggcacagt ggacctgatt cctgttacac  
17881 cgggttcagc caaaaataag gtggttttag ggcggttgcc gaacggggcc ttaaagctaa  
17941 gtccctgatga ttttgtaaata accatctata cagtagttaa tgatgatact aaagggtcat  
18001 tgccttatct ggttgcaaaa agagaaccgg ttgaccagtt ctctaatact attacagcaa  
18061 ttaattacga tgagcgctat tacctcaacg ataaagactt tattgacgtg ccggttgatg  
18121 attctccaat ttacattcga tatgaccagc tggatattaa tctggcgcgt ttatatcaga  
18181 tgcaaagagg ggatttgcca acgactggcg aaatcagttt tgtagttgaa tctggtgcac  
18241 tagtttctag ttcgagttct tatcgaccgg aaaccagatt tgtctataaa ttcgactaca  
18301 actccagtcc gccgaaacag gaatttattg ccctgcagc gactgaacta cccgccattg  
18361 atactggtga gttccacact gatctggtgg taaatctgac tattaaggt gctgtgtgtg  
18421 ggcggtgtg tgatggcggg ttacctcatt tggcatttgg cgcattggag tccgatccgg  
18481 attacaactt tactaaaacc cgacgtgatg ggtttcaggg agcaccgggt ttattgaacc  
18541 ggcacagcaa actaaacctg attattgatg gcggcactct agctcgaggt ggatctggtg  
18601 gtggagcaac accaagcggg atttacctg ggttgtctta tgggtgtcaa ggtattccgg  
18661 gtggagctgg tgcaccattt ggacgggtca tgacaggcca gccaaattca agcgactcac  
18721 aagattggcg ctggtatttt ggaagtact tcaatgtctt aaaaattact gatgccgaag  
18781 cttcgggtacc cggaaaaggc taccgaaccc aaaatgaccg ttatggatcc ccattatcag  
18841 gtgatggcgg aaactggggc gaacgtggta ccaagtctac taatgatgga acatggaact  
18901 ggaaatacca tggcacaact gaaggtcagc cggggccagg tggacctgca attgtgggag

18961 ttgcaccact gacaactcaa ttgattaatg gagggaaaat cttacaaaacc ctttaaacct  
19021 tataagaact ttgagcaccc aattcgggtg cttttttatt acctaaattt tctggagaaa  
19081 ttaatggaac cagtttccac tagcggtttt acagcacttt taaaattata tgggattgca  
19141 atcatggtga ctttagcagt cggtttggtt gcagcagttg tattaatgac tcgtatgcca  
19201 cgctcaccac aagagtgggc agttggtttg atctgtacgg ttgtatcaag tttggctggc  
19261 ggctcattca ttattgtgaa gtggggactt catgaatggg ttactgatgt atgggggatg  
19321 attgctctag gtgggttctt ctttgtttgt ggtttaccg gtggggcttt agtcctgttg  
19381 atttttaatt ttatagataa acaggaaggt aaaacgatcg ttgaagtgat caaagagttt  
19441 aagaaagcca gaaaagacat tgaaaacagc taatgccgcc ttcgggcggt tttttacatc  
19501 tgaaggaaac cgaaatgaac attgaacaat atctggacga gttaattaag cgtgagggcg  
19561 ggtacgtaaa caaccagca gatcgaggcg gtgaaacaaa gtacgggtatt actgaagcag  
19621 tagcacgtac taacggcttt aagggaaca tgaaagattt accgcttgat gtggccaaag  
19681 ccatttataa aaagcagtat tggacagatc cgcgatttga tcaagtgaat gtaattagct  
19741 cgttagtgtc tgaagagctt ttagatactg gggtaaattg cgttaccgga tttgcaaaac  
19801 cactcttaca gcgtgcttta aatttgctga ataaccaagg taaagcaggt tggccagatt  
19861 taacagttga cggaatttat ggtccagcaa ctcttaatgc actcaaaact tatctggcca  
19921 agcgtggaaa agacggcgaa aaagtcctgg tgcgtgttct taatatcatg caagggcaac  
19981 gttacattga aatctgtgaa cgcaatccta gccaggaaca gtttttctat ggttgatcg  
20041 ccaatcgagt tgttatatga aagtctttca ttgcagacga tcaaagatag ctttaacaat  
20101 tacattgctg tgcattctat tttcaggatg cacagctcat acgatcaata gcaatgtcaa  
20161 tgtctcaatt tgcgctagag cattataaaa aaaagccctg aatgatcagg gctatttaat  
20221 aaacttcaat tcacatactt ctacaaagct cgagtagtct tatgtttgtt attgtatagc  
20281 ttgataatcc tctatctttc atcctagggg tgtgcacata cttctatcct taaattgtgt  
20341 aatgaaattt cttctgttgt agttgagaag cttttcaatc tgttaaaaga atccaaaag  
20401 catcaaatga ataaagaaac tacttattta acttgaatca tcattttctg tttactaata  
20461 aatgaaagtg cttggatgta tagggattgt ttttttaatg ttatgttata atataacctt  
20521 ttcttaaaaa agggggggat tatgaaacct ttggcagctt taccgttaat ttttatagca  
20581 attcagcaag tgcaagctga ggagagaatt gcaattttaa agcctcttgt ttttaaggca  
20641 aatgcattaa aggaaaaaaa ttatgtggtg gacaaagaaa aagtagaaag ttccaataca  
20701 ataggtgatg ctcttaaaaa tataacaggt atacaaagta cttcatttgg acccaatgca  
20761 ggtgcaccag ttatacgtag tttgagtgga aatcgggttg gagtaattga aaatggagaa  
20821 tttattaatg gaatgaatgc atttagtgga aatattaata taccattcga tccaattttt  
20881 atagaaaaag tgatagtga caaaaatata gataatatc gttatggcgg aaatgcaata  
20941 ggcgggagtg ttcaaataga atcgggttta attcctaaaa aaattgaaga aaagccaaac  
21001 aaattagata ttgtctttcg gaaaggattt aatgattttg atgtaaaggg gttcaatttt  
21061 aacatcaatg atcaaaaaaa ctggtctaca aatataagat attcagaata tgaaatttct  
21121 tcttataaaa ttccaggaaa tagtaagacc aaattatgtg aagaccagat tttttcaaat  
21181 tcaggtggga tcaatagtgc attagcagct tctgtcaaaa aagatagtag agtccaacat  
21241 atttataaca agtcgtcaca accatacata gataaattta tgactgagaa tcctgattgg  
21301 gcagatggcg atttttcttt ttatacagat aagcccat ctatatgggg aggaaaaaca



21361 tatataaatc caaaaaatcc agagtacata cctaatactc cgcaaaatac aataaaaaag  
21421 atcaatacgg atgttacacc aaattatttt aaaaaattag gtaacagtta tgctcagaat  
21481 gagaatattg ggtttgaac aacatacttt ttgataaag gtttcattgg attgagtga  
21541 gataagaaaa aaagtgaata tgggtgtacca ggattttcat tacaaaatca atcttttgc  
21601 gattcttatg aaacattacc ggttgggtg aaaatagatc aaaatcgttt tgtattaaat  
21661 tccaatttta tccaaccaat ttctctgca gaagagataa gtttgaattt tcaacagctt  
21721 tctaataaat ctggagaata tgttgggtact gcaaaagcta atgagtataa aattgataat  
21781 caattaattg aattaataat gaaacagtca tcctttaagg gattagatgg gatacttggt  
21841 tttagcctta aaaataggaa tatcgaagga agtgggtactc agcgctatct acctaagtga  
21901 agtactatta gtaaagctat attcttaca gaagaattaa atatcaaaca atttacttta  
21961 aatacgggct atcgttttga aagaattgaa catgagcttc aagataatga ttttaaaacta  
22021 gcaagaaatg ctagtaattc aagaatagaa aatagaaaat ataattttaa ccaatatctt  
22081 atcggaggag aatataaggt taataatctt ataaatttaa aagttgatta tggattttca  
22141 gaaagagcac ctgaagtga tgagctctat tcaagtaatg ttcactattc tgttatggca  
22201 caagaagaag ggcaccagaa tctcaaacca gaaaaatcta aaagtttaga gttaggtatg  
22261 tttttgaatt ggaataattg ggtcatgcaa cttgttgggt atcaaatgga ttttgaaaat  
22321 tatatgtatt tatctcattc aggtgttgct gtgcaaatc gattaccttt aaaatactgg  
22381 aaacagacag aactgacgt caaaggggtt gaaattgatt taatttatga ttttaactca  
22441 gctcatattg ggaatattaa actagggtgt ttagctgatt ttgttaaaaa taaggctgtt  
22501 aatctacag atataaggtt agctaattgat ggagtttacc taccaaatat gcctactaat  
22561 cgttatggca tgtttcttga gtggagaaat gattcttggg aaggtaaaat ttcaagtatt  
22621 tactacgatg agccaagata tctaggttaag aatgtaatac aggaagttcc tttatctggt  
22681 tacaacttac ttgaatttaa gatagataaa aaattaaaga ttaaaaatgc ttcatttgat  
22741 atatttttaa atggtacaaa tctgctgaac gaagaggcta gaccacaaa ctctcctcta  
22801 aaatatattg cccctctacc agggcgagca tttcaactgg ggataactat gcatatttag  
22861 gttgctaaag atataaagtt agttcttctc tctgtcttc aaatttagta ataaaaatat  
22921 agtcttaaag ccgaataatt aatcggtttt aagattttta aataatcaat tataaagttt  
22981 aaaatttttt atttataaaa tgtgttcaa taatgaactg atttttttagc tcaaggagcc  
23041 atcgatcat atataaagaa tattacaaag gttctttttt aatttttctt taagggtatg  
23101 tatctaattc tagcatcttt tatatttaag ggttttttaa aatggcactt aatgttttta  
23161 aattcaaaaa aatatgcaag gatgttacac tattaaattt taatttgctt ttatctatct  
23221 ggctagggtt atttctgaat atagggtttt ttaaaaaaat ccatcaactt acaccttata  
23281 atggtattaa gtcagttctt ttcttagggg cgacattagt tattttaata gcggcatata  
23341 atttaatttt tcaattaata aattggaaat ggactgccaa aatctttgca attttattga  
23401 tatttatttg tggcttttagc tcttattttg taaacacatt ggggtgcatt atttcacccg  
23461 accaaattca aaatatggtg cagaccgatg tttcggaatt taccgatcta atctctttac  
23521 gctttgtttt atggacagtt tttttgtta ttttgcccat ttttttaatt actcaagtta  
23581 aatttaaaaa agaaaaagca tcacgggttg tattgaagaa agtattctca ctggtagctt  
23641 catttgaggt ggtcggtgtt ttacttttta ctactatgt cgatttcgct gcaatatctc  
23701 gtgagcatcg tgatttaaaa gggatgattt caccgcaaaa tagtatttca tcgcttatgt

23761 cttactatca taagaaggct ccgaagaaaa atctgcctct tgtgatatat ggacaagatg  
23821 ctcatcaagt tcagcaagta caaaagaacc tcctaagtt aatgatactt gttgtaggtg  
23881 aaacggcacg tgccgaaagt ttctctctaa atgggtatgc aaaaaatacg aatccggagc  
23941 tttctaaaca agatattttc aacttttcgc aagtgagctc atgcggtacg gcgacagctg  
24001 tttctgtgcc atgtatgttc tcgggtatgc cacgtgtaga ttatgatgag caattagcta  
24061 gtcaccgcga aggtttatta gatattgcaa aacgtgcggg ttaccaagtg acttggattg  
24121 ataataactc ggggtgtaaa ggtgcatgtg atcgcgttga acaataccag attccagaaa  
24181 acttaaagaa aaaatgggtg aaagatggcg aatgttatga tgacattctc attgacagct  
24241 taaagcagta tttggctact attgccaaag atgatgatcg tccgcgtttg attgtttctg  
24301 atcaagtggg tagtcatgga cctgcatatt acaagcgtgc acctgaggca tatcaacctt  
24361 ttaaaccgac ttgtgatact aatgcgatac agggctgttc gcaaactgaa ttgctaaata  
24421 gttatgataa tacaattgta tatacagacc atgtattaag ccaaatgatt ctctgtacac  
24481 gacaaatttc acagaaccct taccctatca gggttctgcc ttcttaaaat tgccaaaatt  
24541 tccttaaaact cttctttttt cccaaaacca attaaacgct gaatcgccat ttgaacatag  
24601 tctaaaccat agcgaaataa actcattgag agtcgtccat gcttctttat ttttatcgct  
24661 tttttttgat catgttgcca ttcacccgtt aagtaacacc aacagaagct tatagctaac  
24721 accgcaatca attttttcac tcgtctaggg tctgtcaagc gcgtattttc aagattaaac  
24781 ccgctgcctt tgagacaact gaataagggt tcaatttccc agcgtaatgc ataatcctga  
24841 atagcattgg cattaaactg aggagaaacg acgagtaaaa gctotccatt ttctaactgt  
24901 agtgcaacta tatatagttt caccgcacca accaaaatcc gtcgtttacg acattcaatt  
24961 tgaccaactt taagatggcg aaataaatca ctaattttat gattctttcc taaatgattg  
25021 gtgacaatga agttttttta acacgaatgc agaagttgat gtcttggtca attaaccatg  
25081 taaaccactg ctaccgata aactctctgt ctgcgaacac attcacaata cggctctttac  
25141 caaaaatggc tataaagcgt tgaatcaaag caatacgctc ttctgtatct gaatttccac  
25201 gttttattaag caatgtccaa aggataggtg tcgctattcc acgataaacg attgcgagca  
25261 tcaggatatt aatatttctg tttccccatt tccaattggt tctatctaaa gtcagttgca  
25321 cttggtcgaa tgaaaacata ttgaaatca actgagaaat ttgacgataa tcaaaatact  
25381 gacctgcaaa gaagcgtgc atacgtcgat aaaatgattg tggtaagcac ttgatgggca  
25441 aggtctttaga tgcagaagaa agattacatg tttgctttaa aataatcaca agcatgatga  
25501 gcgcaaagca ctttaaatgt gacttggttc attttagata ttgttttaag ataagatata  
25561 actcattgag atgtgtcata gtattcgtcg ttagaaaaca attattatga cattatttca  
25621 atgagttatc tatttttatc gtgtacagag caaatgatta atactctaaa agaaatatca  
25681 aagtatcaga caggtttatg gtatttatct gatcatggcg aatcaaccgg agaacatggt  
25741 ttatatttac atggttcacc ttatgcaatc gcaccgagcc aacaaacaca tgtaccaatg  
25801 attatgtggt tctctgaaag ttggaaacaa cataatcttg ctcaagtga ttgtttaagc  
25861 caacaaacta aacaaaagtt aagtcaggat aatttattcc caagtttggt aagtttgctg  
25921 gatgtaaaaa ctacggtagt aaataacaaa cttgatatgt tgagccaatg taaataaata  
25981 tatttttaat ttatataaaa cgaagcaaaa tagacttgct tcgttttata aaatgtattg  
26041 gttcttttat atttaaaaaa taagagggca gtcgtaaccc ggataaacac cattcttata  
26101 gtcgaatgtc ggttcgaata gatctagtag gtgaactcga tctttattta taggttcata

26161 gttcgcgcac atacaaagta acctctttat gattttcgaa attacttttc catcataact  
26221 aatataaata aaaagagggg aaataataga ctgtagacgc tattattcac cctcatggta  
26281 tatactcttta acgccagcta ttcggaactt tgaatttacc tgtaggcatt ggagaaccca  
26341 gaacatactt aacgttgtaa attaaaccag gcaaacacgt gtttggtttt tcattaaagc  
26401 aaacataggt attgtttctg gatggtttaa ttaacttata ttgtgtacca gcacttgaga  
26461 cataatagac accatttggg gtagtcttaa ggccagcatc aactttagaa atattttgat  
26521 tgtaactctg gcttgatttg ttaatagctg agaaataact acaccctagc gatttagata  
26581 cttcagcagc tttacgtaat gcgtactggg ttgctatcga tttatgggta tatcgttta  
26641 cagatgcgcg tacttgaaag acattatcat caataatagt ggcttcaacg ccaccagaag  
26701 ccccatcttc ttgataaggt gtagtacagg cttgtaaacc aattgttgct aaagcagcta  
26761 aaaatatctt tttcataatt tatataaagt gataaatgcg tcacattaat tttactatt  
26821 tagaagaatt tttcaattac ttaaggattt cttaaaactt gagttctaaa aatctagaat  
26881 ttggcctgcc attttaaagt tatctaacac ttgaatgtgg tggtaatta attcttgagc  
26941 ctgatttctc gattcatttt tctcgaaata taagcgactt ttgattaatg cttttactgg  
27001 ttcagaaata atcagctctt caatcatatt catagctttc tttaaatcat cgaaagaaac  
27061 ttgaatatat ccatcagtca catcgttatc atcatcgta gtggtatggg taattagcct  
27121 tttaatcgta tagcttctta tggccaagct gttcgcgata gtgccaaagg tgcggcgtaa  
27181 atcatggaac gtaaatcga taccagaatt ctgagttact ttgtcacgtg ctgctcggcg  
27241 gtctgaaata tgggaaacac catttctatc ggtaaagaca tatttgttat caccggcacg  
27301 tttttttcgt tcacgcataa tgtgccaaag ggtatcacc ataggtagca aaagatcctc  
27361 atggtttttc gtattaataa ttttgatggg accaaattga agatctacat ttttccattc  
27421 aacagattct gcttcactac gtctaaaacc agttagagca agtaagaata aaaagtcttg  
27481 gtttggtgac gctctaaaat cgttattttg ttcacccatc caataagtag tggccacagc  
27541 caatgccc at gcttcgcgct gatctgcacg aacatggcct tttctacgtt taattttatt  
27601 gaaagctttt tcttctttaa cgataacaac cgggtttttt atatttagaa ttttattccc  
27661 ggactcatcc ttatacctgc taatcgtatg gttaaagaga gcatgtaaaa attttgatgc  
27721 aagattagct cgggaagggc ttgctttcga agcttcaga tgacgatcaa taatcattgc  
27781 actggtgatt tggcaagtt ttaaatcttt ccaatcacta aagtagtttt ctatgcatcc  
27841 gtcataggca attaaagatg tttccgccag ctttttacgc aatttatagt attggtgaagc  
27901 ttcactaagg gtagggacta gcttttgtaa ggcatcattt tgaattgctg aagctcgtaa  
27961 atcacgcttt tgcttaactg gatctacacc ttcacccatc aagataagaa gccgttttagc  
28021 ttcagttctg gcttgttcta atgtatagac gccatgtttt ccaataactt tacgtttaga  
28081 cttgccatta ggcattttct tttcagcaaa atagctttta gttttgccc cacataagcc  
28141 aatcctata gttactgtat ctctgtaaaa gatttgtttc tcttcagaca aaggaataga  
28201 gtctattacc gatttagtaa atttaatgtg ttgagccatc tttaaattaa gcaatacaaa  
28261 gcaataccta acgatacaat acaataattg tgaagtctat taagagtcta ttttgaagg  
28321 ttggtctatt aaaaaagaga gttttaagta ggggattttg ttttaagtta ttgttatcta  
28381 ttaaaaaata atgctccgaa gatgccgctg catgtcgta ccottgaacc ctaaagtcca  
28441 gcgggtcttt ctcaattcta gcaatacatt gcaatattaa gcaataccta gcgatattaa  
28501 aaaatcaata tttttaataa tttatattaa agcaatacaa tgcaatatta cacaatcttt

28561 agcaatacaa aaatagtcta ttaatgggtct attttgataa atacgggtcta tttttcaagt  
28621 ttaagtctat taaagggtcta tttttgggtga ttaaaaaagc ggcacttagc cgcttatgct  
28681 gtatgtgcc a tttgttttg ttcaatataa gccaaaacat cagacttcat ataatttact  
28741 tgtcgtttat gaggtttaga gaatggaatg ccgccacctt cacatctttt cttctgcaac  
28801 cacggtaagg atacgtgcat aacaatagct actgtttcag gtggaaaagt ttgattatca  
28861 gcagcttccc aaaattcctt cttagcagcc tctttttctg catgagtcac acgatctaata  
28921 ttagttaaac gtgacattta tttctcctta ctttcgctt taggatttgc ccaccaaagt  
28981 acagggccat cttctgaatc aaatgctgca attaaaaaga gtccttggtc tggcggttct  
29041 ggcttccagt ttggccaaac tactgcatct tccggtatat ttggtatttc atcgtaattc  
29101 aatagttgag tttcaatttc aactctaaga ttcatttgaa gttgtgcca ctgttctctt  
29161 gtataggctt cagctccttc ttcaatgggtg tcaaacaatt caatatctgg atgaaaccaa  
29221 ttgaaaagg tttcagggtg ttctattggc tggatctgat atttaaaacc cgtctcacta  
29281 gatccataaa atagttttgc ttcatcaaag cttttgggtta caagaggggc agagcctttc  
29341 ttgtagcaaa ttactatttc atcaaattta aaaacacgtt cagctgtctt caaatcaaa  
29401 cattggtaca taggttcaact aaaccaactc tcaacataaa atagattttt aatatgatct  
29461 ttgcgggaac cgtgccattt ctgaactttg ataacatcat caaaaatttc taagaaaaag  
29521 ttgttgctt ccttttcatg catttttcta taacgctcaa cagctcgctc agctatctct  
29581 tttgaagctg ctggcgtttg cttaaaaggc ctgtaacctt caggctcgat tgcaaccgac  
29641 cataaagttg attcactcat ccttcagctc ccgattcgct aacacccaac ttaatgcaac  
29701 cttctcagc taaatcagca taccaacagt agtatccttc accgtcataa ccatcttgga  
29761 gccatttgat ggtcatttca gtttccatct ggaattgatc tttttcccca tctggcgcac  
29821 caaaatcaaa ggcttctttt agttcagcgc aagttagagt gacactaggg gtgggagtat  
29881 ctggcacctg ctcggtttg gctttatttc ataactgcca agcatcatta gttacaatat  
29941 tgaaatagcc attcattggt tcaactgaatg ctaggatgtc atttttacga atagcacttt  
30001 cacgtttaaa aatttctgta gttttgaatt gtgattcaaa agggatacgt tcattacctg  
30061 tcatttaagc caccatctct gcataattct ctttagtcca ttcaacaaac tctttataaa  
30121 gctgctgcgc gggtttattt aaccggttgt gatagtcgat cgttatgcgg cgccaagcga  
30181 ctggtaccgc ataattgctg gttagaaaca tcgcttgatc catgccttgc cggactatta  
30241 cgtagccag caattgcaag tagtacataa aaccaagcat gtgtttttgg ctcactttct  
30301 tgtactgatc tttcatatta gaaaccgtct cctaataaat aatcaggctc agcctcttga  
30361 agtggcgtag atgtagggtt ctctaattca aagcggcggt tcttaacaaa gtccatgagt  
30421 cgtgattgaa tctgtggatc tcgtgcggcc acatctattt ccaaagcatc taatgttggt  
30481 agatcgggag cgttttggat ctggaccatt agtgaagggt gttcagttgc ttgcccctta  
30541 gatttttctga gctcttcaag acgtttgtga gttgcaagta gcaaaggctc catttgttta  
30601 tcagaccaag tgcgtgtata tcgataaact gcatttactt cgtctggtgt ttttgagtcc  
30661 ttaactcgtt gcagcagggt atcaagtctt ttctgatatt ctgaatcagc gggttctgat  
30721 tcaatagccg gctcagctgt ttgtgctttt tctacaacct ctgggttttga atttttaact  
30781 ttttagagatt ccgcatgact ttctgaaggc ttttcttctt cgacttcttc agtaggctta  
30841 tttagaagtt ttagaatgtc ttcgcaaac tcaccaccgc tgattttaat aatcgcgcat  
30901 caatgagcaa atgcattatc aaaacttgag tgaacttggc catgctggag catgcgcaat

30961 tgtccttttag atccattcca cttaaactgc tgcacaccta attcaacagt tgggctaggg  
31021 taagagcaag tagaaccttt ttctggcgca actcttaatg gttctggtac ctcaaattca  
31081 ccaataaaaa tagttctagg ctttaattga aattcgaatt tatcaaaaac atcaaagcca  
31141 aagtcataag ggttaaattg ttcccagcca ttacgctcag tattatttac taaaagtaat  
31201 tcaccgttgg cccaagcaag ttggttca actttattta gaattttcat gctgtcatcc  
31261 ccgttttcgc taaggtttca atttcttgtt taactgcagt tagttttgcc gcttcaattt  
31321 ggatcagggc atctatgccg aagtgtcac aaactgtttt tacatcgagg ccacgttcag  
31381 caataaagtt ttgaagttca tctctttgtt gatctgagat accgttaaat tctggtggac  
31441 taatccaagt gccacgttgt ttatcaaacy tgcaattcaa tgccttagct ctcatataca  
31501 ttgcttggcg catgttcttg taatacatgt gttctttatc aagcgactca gtttaattgat  
31561 taaggtcacc tgcattgctca gcttcttcac agctttgttt ccagttttct agctcttctt  
31621 gggcttttag tgcgtcaagt tgtgcaggcg ttaagggtgt aatgtgatct ttagcttgag  
31681 taatcaggtc agccaagaaa gtaggatgtg ctttaagatc tggtagccat acttcaccag  
31741 tttcaccacc taaagcacct gagtttttcg catgatgtgt aggcgagggg ttaaaattaa  
31801 taacgcgggc atttttacct tcacctgtag taacagttgt tagataaccc atcaaactcg  
31861 cgatacggta aagctcggtt cggtttttac cacctagatc tgggcggtta ataatttgat  
31921 caccgttttg atcttctgat gcgtgtgcaa tgaaaacaac atctttacct aaactgatca  
31981 aagtattgat gtattgcttg aacgtttggt tcgctaaacc ttgagccttt aactttaag  
32041 agccatcttt ttgacgggtt ttagcagtta gcaatagatg ggttttaatg cattcaagca  
32101 ttgcaccac ggtatcaatg actacggttt tatatggtgc taagtctgc ggagtaagg  
32161 ttgcaacatc actccattgt tgaacctgta caaccgcacc acgacgtaat tcaccagtac  
32221 ggtgagcacc acggtcaaag tcaaaagaaa ttgctttttc cgcagtaag cccatcgatg  
32281 atttacctaa acccgatca gcgtataggt acacaataat tgcttgaacc aataaagttt  
32341 ggtcagcagt aataatcggg aacgccattt ttcttatcct catctagagc cgggtgaagcc  
32401 gcgtttttgc ttatatgctt tgcggtcata agtagggatg tttgtttcac gcagttttat  
32461 tgcgagctgc tttctgcgtt ggaaatcgat ttcttgggtg agttcattcc aaacttttgg  
32521 ataagaagtt tggaaacctg acacatttaa aggcgtctta actccgtctt taacttttga  
32581 aagaactgag ccattagcat tagatgcgta cacttgccag ccaatgcgga cagagtagag  
32641 gcccttatca tcacggccta aaaatgacat gtagccgtca ggggtgtttt tgaaattaga  
32701 catgttcagc ctcttacat tcgcatgtac caacaaaggc atacgtaagc gggctaggag  
32761 catctacagg tgagacgtcc ctaatattta aaggaataat ttctttgcga tatttaacta  
32821 aaaccacatc accttcacgg caattgacaa ttcttctctc agaagaaaaa cgtgcagatt  
32881 tagaagattg ggttactctg caaaatgaaa cctcatcacc agctttgatt tttgaacggt  
32941 caacaggaat catcttcttg caagtagggc agttataatc tttcattagg ctgcctccaa  
33001 ccagttatta cggtcgatat agccagccaa taaaatattt atatttttat ggtcatcatg  
33061 attggtaaag tcattgaaag acttcccgt tagatccgtt actgaatcaa tagccaaatt  
33121 tgtaatttca gcagttgtaa agtcagatcc agctacgccc tagctatcag ctacaccgtc  
33181 aaaatcgaag ctacgtttta atttgaagcc gtcaatgcgg ataactgctt caccagattt  
33241 ttctccagtt ttcttaacag ccagaagttc atattcagaa gcaacgactt gctcgctttc  
33301 atatgagtaa ttagaaggga cgctagaatt agcagttcga tattcacaag aactcaaggc

33361 tacaagtaca gcaattgctg taactccagt taccttatgc ttgtttgaaa aggtttttac  
33421 gttcataatt gatctcgcag ttttgcaaaa gcacatcgga cctggggagg ggcggtgtgc  
33481 ttttttgttg tctgtgagat aaatattagg taaacctaat tattaagtca ataggtatcc  
33541 ctaacaaaat tagaaatacc taatttttgt gttttaatag acaaaagaaa acccacacgt  
33601 ggtggtgggt agattagatg aattggatcg ctttttactt attgctcaat acttttgctt  
33661 ttgcctctct tgattctttg cgatctttta atgttttttc aagcaaagag atttctctta  
33721 agtcagacca agctaagaag aagctaaaaa ttgaggtgag tccaacagaa agtattagag  
33781 ctaaaagatg cttagctgaa agtaagccta ataaattaag tatatacata ctaaaaacaa  
33841 gaataataaa aagcatagcc acatataaag atgacttact tcttatgtcc acagttgaag  
33901 tcaacctatc tcgttctgac tgattttaaac catcaagctt taatgcatcg agcatacctt  
33961 tataagccaa ataaatttga cttaaaggga gaagcagtag aaatgaaaat tgaaccagat  
34021 ttattgtaat atttaactct aaatatttaa aaattattga aaatatagca aacagaccga  
34081 ctaacactag tgcgataaat ctagcattat tgtagaaggg taagtagcgt ttagccatat  
34141 tagtcaccaa aatttatatt ggtagtcac caattatata attgaacttt taggcgctcg  
34201 ttataaaactt tattattgat tgtttcaact gaaatcttgc cgtcattttt tagattatca  
34261 gccgtaacct tgggtcccatc ctcaagagta ataacataat catcattatg tcgcatggat  
34321 gaagctacag tatcaataac tttttgccca ctttttgagg ttttgcggtt gtatgtaagt  
34381 gttaatttta actttagggt tgcgtcatca agcccatcct ctagttttaa attttctaaa  
34441 tcaactccaa aagctgactt aagcacatca accacattat ctcoaatttt atagtcaatt  
34501 ttcgcaggta tgcttgattc gacagtatga acaggttgaa gttctgttga cccaatgcca  
34561 gatgagattg aaatagtttt agctggagtt gattcaagct tttgcttaac agtgggattt  
34621 ggagcatctt ttaatattaa tgcactattc tctggcaatg ctttggtctgc ttcacccaaa  
34681 agccagccca aatatgactc caaggttcta gcggtaatg atcttgattg aatgattgcy  
34741 acatgggttat caataacacc aaagtaaaga aactatcaa taaactcttt tcttacaacc  
34801 tctgtagcgt caacgccatc ttcacatctt ggcagatcat ctgttaaata ggttttaatt  
34861 ggaaattcag tagcatcatc actgtctatc tttaatacag cctgagcttt gcctgactca  
34921 acaataatca actcgcceaaa gaacatgctt tgggtgtgaa tagcatgatt aattagaata  
34981 aaatcatctt ttgttgcgga gacaaattgt tgacgattta tggctttata gtaaaaagaa  
35041 tccttatcca gcaattgtgc ttttagtaat tgacctagat tggcgccttt tagaaaaatc  
35101 acttttttgt agtgtactgt tttgtctttt actactgttt tactcattat ttcctcctcc  
35161 cgaatcgctc taaagtactg tgtagggttc acaacttatt aatctttggt gttgttaatt  
35221 ttatgcccaa gctttccttc ttttaccac tgcaactact gttcatttgt aaggactgga  
35281 ataaagactt tatcaccaat gtcctttgag aggatcttca cttcttcggc tgttagcacc  
35341 aaagcttcac catgtttcgc agcatcattg atgcgagcaa taatctggtt gattggtcgt  
35401 tttgaattgt ccataagtct tcctgtgatt aatgcgaata aggatgttct tgtctatgct  
35461 gacttggcgg cagcatatct gtaatagcgg taatacttcc aacctcgtcc atttcaaaga  
35521 aaaatcgctc accaccattc acagaaagca aacttaaaac ccaccattg atgccgacaa  
35581 attctttaat tgtgcactct ccacccctca agcacacctg aacaaactca ttcgggcacaa  
35641 gatctgcac agggctgcac acaacgtacc aaccattacg aattgctgga aacattgagt  
35701 cgccagtgcc tttaatgcc taggctcttg gtctgtctga gtgggttgga acatatccat

35761 caccagcatt tccttcataa cccatgtcag taaaataacc atccattccc atcttgagtg  
35821 acgcctttac aggaacccaa cgttagatg atggggtaaa aggtttttcg ataattgttg  
35881 aaaataaaag agcttcatca ctatcactaa tgttgatatt ctttttgaat gcttcaatat  
35941 ccagttgttt aaatttatct ctcggtgttg attgaatctc tcctgtgcc gatgcaagcc  
36001 aagaaggatt aacattcaaa aattttgaag cacgtaataa attttcacct tccattgttt  
36061 tggattttcc agacagccaa tctctcacag aaggagggtt gactcctact gcacgagcaa  
36121 gctcaacacc tttaatcttt ttaggtggca aaacttccat agcataccta agtcgttcag  
36181 caagagtatt catacaacta tcctcacaat gttaggaaat cctaacataa ataaaattag  
36241 gtattcctat tgatttatca taaggaaatgc ctaataatta aagaaaaatt aggagcacgt  
36301 tatgaatgac gcacaactta tagacaagct aggtggtgtc acagcggtag caagacttct  
36361 agggattact ccgccatcag ttagtggatg gaaagctatt cccottgata aaaaaatcag  
36421 gtttagcagtt attgctgaag atcttggttt aacaacacga aaagagcttt tcctgataa  
36481 ctatcaagat atttggattg aactacgtcc ccagacgaca aaaagtagaa acctggatc  
36541 attaacgcgt taggacctta accatgagca aagtatcaaa tgaattgcct gcaagcgcta  
36601 gcaataacga atcgctcata ttgcaagcgc taaatactag caaccaaaga caagtagccg  
36661 agaaggtggg aatagatgca agcaccttgt cgagaatgaa aaatgacaag aaaaacaatg  
36721 gattgacaga gattgaattt attagctctt tgttgacagc cattggattg aagggtgtgc  
36781 cagaaagtga tgtgtattgc tcacctgaaa ttgcagaagc aacgcgagtt tatttagcac  
36841 atgcattcac ttcacctgaa tacatgcgga ttttattcaa ataaaaaacc actacctgcy  
36901 ggaacaggag tggtaggca ttcaaatgag gtggatcaaa tgaacacaaa caatttatca  
36961 gaacaaccaa tcgaactcaa ctaccagat tttttaatag gtgacgttgt agtacttact  
37021 aaagagtgtc gaagttttaa atcaaacgat ttatttgagg ttaaaaataa aactttgact  
37081 aggttgtgga ctatcaaatc ggagaatcat ttgattctgg tttcatcaaa agaaatccgt  
37141 acagcaacag tagcagagct caacgctaaa cgcgcctaa caaaagctga gcaagcatta  
37201 gcggagggtg catgaatagt caatttaagt ataaacctga gtacaaacag actcaggaaa  
37261 ttcagtcctt ctttgatcca gcgttagtga ttctcaatga gctacatgat cgtaaccgta  
37321 aaaatctaag agccaaagggt tatgacgaaa ataagtgtgc aataacgcgt gaagaatttt  
37381 cacaaactat ggcacagcgt tttcgcatta atcagtgggt agcagggcag atcgtaata  
37441 gtttggtcaa tgctgacttg gttcaaaaat ttggtgggta tgtaaagcct aaggctcgtg  
37501 tacatgagta attttgtgcc taattccttt caagtgccta atgcatttgt tgacgaggtt  
37561 ttaataaaaa tctctgatgc tgcagtcaaa atttatttag ttatttgccg taaaactcgt  
37621 ggctggaata aggagatgga ttccatctct ttaactcaat ttgaagagat tacagggaag  
37681 agtagaccga cagttgttaa atgccttaat gaattaatta aagttgggtt agtcgtggaa  
37741 caaccaagca caattcatgg aaatacatc aaattaggta acgatactag cgttggttta  
37801 gtgcttaaat tccctagtaa aaatttttta ctacctgaaa tttatggcca aactagttaa  
37861 aattctttac cactgctagt taaaaatttt aactaccta gtaaaaattt tttaccgcta  
37921 ctagtaaaaa tttttaacac acaaagtatc actatcaaaa acaactctca aagtaataaa  
37981 aaaataaata aaaaaagaga gcctgtttct gaaaaaccta aatcagaaaa accaactgaa  
38041 tttaatccac gtttagttga actaccagca tgtgtagatc cagagctgtg gaacaatttt  
38101 gttgatatgc gtatcagcat caaaaaacca ctttctgaaa atgcagtaaa gctaatacct

38161 aaaaaactta tctcgtttgg ccctttggct aaccaatcac tggaaaactc aattatcgga  
38221 aattatcagg gtgtatttga gcctcgccaa aatcaaattc agggaaaacc acaatctcat  
38281 aacgttcctg aagaaccggg ttatttcact caaatgtacg ctgagagcaa ccgttcaaac  
38341 gtgattgacg ttacgccagt gtcacaagat tttggaggct attaatcatg aatgaattag  
38401 caccatttga aagtttttta aaagaactaa ttgcggctta cagaactaaa tacgctgttc  
38461 agttcaataa gaattttcca gtagagggga aaaatgccgt tccaatgcaa atcgttgaac  
38521 agcagcttgc taaagcattg gttgggggta cacctaacca acttcaaaga ggcttagcgc  
38581 tattttacgc aagtacaaat acatacatgc ctaacttcgc tgaattccgt gctatgtgca  
38641 tgggtgatga ttggtggagc gctgagaagg cttgggttaa ggcttgtgaa tacactcaga  
38701 tctctcaaca caaaaaagt acattgccag acggaagaga gcagaaccaa gaaattacaa  
38761 ccttgaccaa atttgtttta gaccaagttt attcactaat ccaagatggt gaaatgtaca  
38821 aagccaaaat ggaatttatc aaaatctatg atgaatacaa ggctgaagca caactgaagg  
38881 gtaaaaccca agcttggtag caagaaccaa ttttattagc tcagaaaaat gagcaaaagg  
38941 tgcataagcc tgtttcaa at gacgaagcgc aaaagcatct ccaatcattg atggaacggt  
39001 taaaaatcaa tggtcgtaaa cctgtaccag tacaaaagct taaggctaag gaaaaagagc  
39061 cagaactcaa acaagagcta ggtccagatc cttttgacaa tccgcacgaa tacgcagaga  
39121 tgtgccgccg tgaaggtagt ccaattccta gaaatattct taagttaatt gatggggcga  
39181 atatatgaat aaattcgaga ttttagcgtg gggtttactc atttcatttt ttacagcagc  
39241 tattagcggg gcggtgggtt ggtggtggtt ggcgcgtaaa gagcttgatg agaaaggagc  
39301 cagccatgaa agcaactaaa ttgattagag ataaaggact gcaatacgcg aaggaaatcg  
39361 tagattcagc acccgataac gcaactgaat ggaacgaggg ttatgagttc caatgtggtc  
39421 aaagtgtaga aatcagccca gcagatcgtg agaagtattt tgtagatttg gttgagctta  
39481 aacgtctggt ggagtctttg aaaatcatca acgatttagg tggagttgag aagctaacgc  
39541 ctgcattcat tacgacagat aagcatgttg gttacacgca tgttcgcatg gtgggaaatg  
39601 ggagattgag ctttcttgat gatttttgcg acttcattcc agatgggtcc atttcaatta  
39661 agcgtgtgat gactgctatc cgcgaccacg aatcaatata cggaggcggg gaatctcatg  
39721 ccaactagat ataacacagg cgagtatagc tacgatcttg aatatcacta tggagatatg  
39781 tcagcaagca tggagatgct tagagcacgt ttaattgaat tgttgactcc tcactgtctt  
39841 ggccgttatg tgaaatggag agaagcatat ttcacatggt ttacaaagtg cggcggggat  
39901 tcgggggtga tgttttgtgt aggtccacac gaatttcata ttgatggggc gttaaggcgc  
39961 tattactcag gttctattga tattacctac aaccagaaag atcgatattt cttgggtggg  
40021 gagaaaaaga aagtcaaatg taaggcttgt aaggggtttg gcttcattcg agatgatggg  
40081 tgggggcata tagataaatg tgaaatgtgt gatgcagaaa aaggagccag ccatgagtga  
40141 gtttgagggt aaatctggaa agtgggcttg ggagattcaa aaagaacaac aagcgaaagt  
40201 ggaggagctg caaaagcgtt tagatggggc attaaaagag actcaatatg ctttgacgta  
40261 tgttgaagaa gacatgcgcg gcaatcatga atttctacaa atggcaatga ttcgaaacct  
40321 taaagctata gagcaagtgc tcaaagggtg tgcttgatgt catcagtcag cattgctgaa  
40381 taccgcaagt tatttcccat aaagaaaaat aaaaagcgcc gttcagcaaa gcaagttgcc  
40441 agacaaccaa gtgtgggtga agtgggtctg gcaacgcatt taagagcatg caagattgga  
40501 tttgaacagg aatataagtt ccatcctgaa cgcaaatgga gagcagattt ttaataaag



40561 ggttcaaaga ttttgattga ggtagaaggc gggatctgga gcggaggccg tcacacaaga  
40621 ggtaagggct atttagggga tatggagaaa tacaactccg cagcaatgat gggttttaca  
40681 gttttacggt tcagcacaga gcaagtgaaa tccggtatgg cattaaagca aattgaatta  
40741 ttaattaagg gtaaatagga aggcgattat gttggttgaa aagtttgatt ttattgagtt  
40801 acttcgcctt gctattgctc aaggcaaagc tgaaggtaag aaaatttcta aagatgtagt  
40861 tttaggtgaa ttagcgctgt tatcgccagc tgcaaagctt tgggccactg tcttgattga  
40921 aaagggtgat tttgagcgaa tcgcaataat taccacagca caaaaacaga ctgaaacttt  
40981 ttacagtaag tatgacttta attttcaaac tgaacgccgt attgaagata ttccgggcaa  
41041 ggttgagttt gttcgtggtg agattaaatc aggtaatttt ttcagagcgc gaaataaatt  
41101 agcggtagag attcataaag aaatggtaaa gaaaaaattt acccctacta atgcccaagg  
41161 tgatcttact aatctggcaa aaggtatggc tgagattatt ttgcgtggcc atgtttttgt  
41221 taaggctatg tgtggagtct gccaaagggt gggtaaaatt gagacatttg gtttaaatgg  
41281 ctttccaaat ggggcaagggt tttgtgaaaa atgtaatggt actggaaaac gaccatatac  
41341 gttgaaagag aaaatgaata ttgctggcat tgatgcaacc aaaacagctt atataaagag  
41401 ttatcagaaa tttgagctgt ttggagaatc aatcgttgct gaatgggaaa atgaaattag  
41461 aacgcgtatt tctcgatcat tccgttttga acttcctgat agtcaagaaa cttacgcttg  
41521 acagttgggt atacacttga gtataaagat ttctaaaatg ggcgaaatgt aaagtaatcg  
41581 ccagaatgaa tttaaagagct cgccaatcgg tgggcttttt tatttttaaa tatttcagta  
41641 ttatcagtgt gttgctttta gtaacactaa acctatttga tcagcgcaaa tatcaaaaaa  
41701 aagggggagc ttgcctacta ggcaagcttt ttaaattgat gatttaaaca caataatcca  
41761 ttttaaagct caatagaaaag atcaaaacttc catagctttt atttgtacta atttattgaa  
41821 tataatcggt tttataattt ttaaaatttt cttaaaactaa aaatggaaaa tttcttggtg  
41881 caacattggt ataataggac taccttaaga aaaatacttt ataaaaatga ggagctgctg  
41941 aatgacaca gtatctcatg tttgcggaaa atattttataa caaaattaaa gatgaggaat  
42001 tgttttcaca tgactgtatt gaaaaatga acttacttat gacatgtata cgcagagaaa  
42061 ttaagggaac agaattttaa ttaaaatata attttattga ttttggtgaa ttgttttagta  
42121 gaccattaga tgaatgtaaa gtaaaaatag atgttagttt gattcctcct cataattcag  
42181 aaggtgagta ttttttatgg ttagctggat taatcgaaaa aattacagaa ggtggacctc  
42241 aaccacctcc gcctataaag aagtttatc cagagtatat gagottgaaa tttgaattag  
42301 attttttacc cttaaatgag gaaaaaatc aaaacgaagg taaagaaatt acggattact  
42361 ttaattcaaa gctttataag gcaactttta agaagtaata ctatattgcc tgtgagttta  
42421 gccaccgcct aagggcggtt ttttttatgg gtaagaataa tggattctac agaatacttt  
42481 tggcttactc ggaaaaaaga acctaaaact aaacctaaaa gccggccatt gcctaaggcg  
42541 aagcaaaaat atctcgaggc tgaggcaaca cttaagggaag agcttgagga tttggcgatt  
42601 ggatttgaaa gtaagtttca gccgatccat accaaacact ggcgctttga ttttcatata  
42661 gtgaaattgc gtttgctcat tgaattgag ggtggtcctt ggtctggtgg gcgtgggtga  
42721 aagctgtcaa ataaagcatg gagtcttaat cgatatgac atgctgaaga gatgggttac  
42781 aaaatagagc gctttcatcc agattctatt ttgtcgggat atgtcatcaa ctggataaaa  
42841 agtgaattag cgagaattga agatggagca gatcagacca tttccaccga ctgattttat  
42901 tgatcaagct gaagaagagg aagcaattag actaacacca gcaccgact taaaaaatg

42961 ggttgtggct aattacttaa ctattggggg tcctatttat aatccagatc atgatcatat  
43021 tgctgagctg cttcatgata atgacgagtt tttagcatto gcgtgggcct cttctgcata  
43081 taaaagcaag caagctatgg tgttaggcca gtgcgaaaaa gtcagtgtca atggttggtg  
43141 ctggcgtaaa gctcgacaag agcaacagat gcgtgattgg tttggttttg tacctactta  
43201 ttttaataact gtcgacgctt ctttctgtga gcgtgcaaac gatacagagt tctgttactt  
43261 acttgaacat gagctttacc acattggagt gatgagagac gaggacggag aaattgttta  
43321 tagcgatagt tctggtcttc ctaagcacta tcttgctggt catgacgttg aagagtttat  
43381 tggcgtagtt aaacgttatg gaccaagcaa aaatgttaag cgacttattg aagtcgcaa  
43441 aaatccgccg tttgtttcga atcttgatat ttcaaatgc tgcggcaact gtgtaatcaa  
43501 ttgagcctaa tggctctttt ttttgcccat tttgttatac gtagttatac gatgaggaag  
43561 ttatggcgac actaaaagag cctgtgaaaa tctttatagt tcagtctctt gcttgctgtg  
43621 atacacctca agaagtggct gaactcgtaa aacaagagtt tggcgttgat atagatcgtg  
43681 ttcaagttgc aacttatgac cctacaaagg ttgctggtaa gaacttaagc aaaaagtatg  
43741 tcgaactatt tgaaaaaacc agagatgagt ttgataaagg cttaattgat attccaattg  
43801 ctaataagta ctaccgattg aagcaatacc aaagacaact tgagaagact agaaacgtca  
43861 aaacagcctt aaaaattctt gagcaagccg ctaaagacat tgggtggtaa tttactaatc  
43921 gccagaagaa tacaggcaaa gacggcggac cagtccaaac agttaattca gaaattccag  
43981 ttccaatgga agattactta aaagcgcgga gggaagtctt agatgagtac tgatgcggct  
44041 cgggataaag ccatccggat cgaggcgcaa gaagatttat atttcttcac aaggtagatg  
44101 ttttaaggagc gccgtggtta taaatggatg caaaattggc accacttaga aatctgcgaa  
44161 gctttaatga aagtttatcg cggagagata aagcgggtta ttattaacgt tccaccacga  
44221 tatttcaaaa ctgaaattgc tgtaattaat ttcattgctt ggtgttttgg taagaatcca  
44281 gactgtgagt ttattcatat cagttactcg gcaatgcttg ccgcaaataa tgccttccaa  
44341 atacgaactc ttgtacaaga agaggcgat agaaaagtct ttcctgagct tacattgcgt  
44401 gatgatagta aggctaaaga cttctggaga acttctcaag gcggtgtctg ctatgcgaca  
44461 ggtacaggcg gtacgattac tggttttggt gcaggaaaac ttcgtaaaag ctttggtggc  
44521 tgcattatta ttgatgacct acataaagca catgaagctt catcaaaaac tattcgagaa  
44581 ggggtaattg attggtttca gaacacactc gaatcgcgta ctaactcgcc agatacgccg  
44641 atcattgtga ttatgcagcg acttcatgaa gatgatttag ctggatggtt gctaggtgat  
44701 agaaaagacg gcgttcctgt agctgggtgt aacggtgaag tgtgggagca tctatgtctt  
44761 tcagctattc aggaagacgg atccgcactg tggccagcaa aacacaatat ccaaaaattg  
44821 aggctaattg agcaagcagc accatatgta tttgccgggc agtaccgaca aatgccatca  
44881 ccgccagcag gcggtttttt taagcccgac aatattcaaa ttgttgatgc tttgctgcg  
44941 gatgtagtga aacaagttag ggcttgggat tttggggcta ccgaaaatga gggcgacttt  
45001 acagtagggt tgcgagaagc tctaggcgca gatggtttta cttacattgt cgatgtaact  
45061 agaggacagc ttggacctga caatgtgaat aagcgcttag aacaaacagc aaaaatagat  
45121 gggaaaaaag tttctgtgcg tctaccacaa gatcccggtc aagctggtaa atcacaaagt  
45181 agttcatttg tgaagcttct tgcgggttat agcgtgatag ctaagccaat ttcaggtgac  
45241 aagcttacac gtgcacaacc atttgccggc caagttaacg taggaaatgt acgaatgctc  
45301 aaagtgtaat ggaataagga ttttattgat gagcttcgtc attttcctaa tggcacacat

45361 gacgaccaag tggatgcagc ttcagatgcg tttaatgaat tacatgaagg ttttgaagcc  
45421 ttctttgctg atatgggatt tgctcgatga gtgatgtaac ttttcaacat gctgaatatg  
45481 ttaagaactt gccatactgg caaaaacttg atgatgtttg tgaaggtgaa gatgcagtta  
45541 aggctaaagg tgaaaaatat ttgccgatgc caaatgcaca tgataaatca cctgcaaata  
45601 aaagcgctta tgaggcttat cttacccgtg cagtctttta tgaagtaaca gggactacat  
45661 taaatagttt agttggtgca gcttttgcaa ccgatccaag ttttaaattt cctccggaac  
45721 ttgctcattt agaacgtaat gcaaatggtg ctggtttaag tacttatcaa ttgggtcaaa  
45781 atggaattcg ccatttattg aagcattatc gttgtgcttt atatgtagat tatcctgatg  
45841 tgccgccagc tcgtaatcta gcggaattta aagcacaaaa agcctatccg atgattcatt  
45901 tactaaatgc ccttgatgta gtgaattggg attcagtaat gatcgataac cagaaaaagc  
45961 tttgcttagt ggttatacgt gaatttaagt ctgagcgcg gctgatgga tttagtaaaa  
46021 ccgaacaaga gcaatatcgt gtacttcgtt tagagcaaga gggaaatggg gaatatattt  
46081 attccgttca ggtgtacaca aagggtgaaa agggtaactg ggttggcgga gagaagaagt  
46141 ttccaacaga ttacaacggg aatttctgga cctatatacc ttttacattt gtaggtgcaa  
46201 ttgataattc agaagagatt aaaaagccac cattacttcc tttggctaatt ctcaatttag  
46261 cccattacag agacagtgcg gactttcaag agtccgtttt ttatatgggg caacctcaat  
46321 attatgcgaa ggggtttaat tgggagtggg atgaccaagc caagaaacgt ggcacttaca  
46381 ttggagcgaa agtacttttg cctttacctg aaaatggtgg tttaggaatt gtacaagccg  
46441 accctaatac tcttgcccgg gaagcgatga aagataagtg ggaaaaatg aaggagatgg  
46501 gggcgcgctt aattgagaag ggctcgggaa gtaaaaagac cgctaccgaa gcgaatagtg  
46561 atgacgccgt tcagcattca gttctttcgc tctgtgtcgt taatatgaat gaagccttgt  
46621 cagcagcatt acgatgggct gctaagtttg taacgcctaa tgtggatgtt ctaactaaag  
46681 atgatttgat gttcgaaatc agtcaagaat ttaacaaaca gggttattta gctgagttag  
46741 ctcgacagtt atttgaagca gctctacaag gccgatcttc atttaaatac tgggtgggaat  
46801 acaaccaaac aggtatgttc cctaaacaaa aatatgaaga agagcttcag aatgttgaag  
46861 cagagcaaga tgggacttta aatcaaaagg tagagtgaga tggcaacaga tatcaaaaaa  
46921 ctatttgaag tactcactca gcaccaggcc tatctttatc gtgcttcac caaaaacgga  
46981 aatgagttat tggctttatt caatgatgat acgagcaaga tgctatctaa gcttcgggat  
47041 ttattggatg agcttaatga gtcggagaaa gttgctttag ctggtggtaa atatacaact  
47101 tcaaatttaa gggaaattag ggatttgatt gcccaatggt ttgccagtgt taatttagca  
47161 ttacctgaag cttttgccgt ttctgctacg gcgctggctg tttatgaggc caattacgta  
47221 gctaagctct atggagcaaa aattaataag cctgatgggg aaaaactatt cttatccgct  
47281 aaaaaagttc cgttggcagg tggcgctctt gtcgatgac tgctttcaag aattgctgaa  
47341 agtgcccgct aaaaaggttg gtatgcaatt cgagatggta ttaattcagg caaaactaac  
47401 caagaaattg ttcagcgat tcgtggtacc aaacggctta actatgaaga tgggatctta  
47461 aatggtacca aaactgatat tgagcgaacg gtaagaactg tgcgaagtca tntagctaat  
47521 caagcctatc taaatagctt caaccaaatt ggctttgaat atgtccgatt tgttagcgtt  
47581 ttagatggac gaacttctaa gctttgcgct tcattagatg gttcagtgtg ggaaataaat  
47641 gatccggcaa agcgagtgcc gccgttacat cctaactgtc gcagtatctt ggttccggtc  
47701 gagaaggacg gtcaacttgt tggcgaacgg ccatttgtaa tggacgaacg tagagttaaa

47761 gacatcccca aagaagagcg aagccagtta ataggacagt tagatgcaaa caccacattc  
47821 aaagagttct ttaagaaaac agatgatttc tttcaaaggg agtggctagg gccaaagcgc  
47881 tttaagctct ataaagatgg gaaatttgat ttgataagt tctttgatcc tgaaggccgt  
47941 ttctatagct tagatgattt gagaaagttg gatgaaaaag cttttaaaaa gttgggtctg  
48001 taatttttct tatgttata tttttaaaac atcagaattt atacaatatg aaaacaatag  
48061 cttttgtatg tctaacccta atttccatca cttgtttagc tgaaccaagt caaaaatata  
48121 ttaaagaata tgatcgattg tctgaagctt tggagtcagc aatggcaaat gcatattctt  
48181 ttgatcctgc aactgggtcaa gtaaaacagg ctactcaagg tttagaagct aaaaataatt  
48241 tatgtagagc tgcccaggcg aaactaaacc tcaccacgtt tttaaaagac aatttagagg  
48301 aatctaaaga gctttataaa tctattgatg gtgcagagac tctagataaa aattatctta  
48361 gtggacaaca gcaggaacaa caaatctcg tttcaaattt gaaaaagac cttgttgga  
48421 ctggatttaa ctgtgagtaa ttattgccga ttacaggtaa ttctaaactc acttaagaca  
48481 caattttcac ctatataagc gcccaaattg cgcttttgct atttatggag tttggcttat  
48541 gagtgaatca aaagtttagc atttggtact taaaagagtt tcagataaat cttctcatct  
48601 tgctctttgt gacgaggaaa caggtattcc attagctgga ttaaccgctg taaaaatgaa  
48661 ttgtagtggt tttgagggtc cagcgactat cacggcaaca tttgatgtag gtggctctca  
48721 aggcattccg ttagttggtg atgaacctag acaaaggtt tggagtgcga aggaaacgta  
48781 gcgaaggca ctacaaatgc ctgaaaagca aatcaatatg tcagatgctc aatatattct  
48841 gagcacaaaa tgaattctgg tgccatttct tcaaattaag gtttcaagcc atggcaattt  
48901 atggttttac ttttgaaaga ttaaaagcaa ttgcactcat caaatagaac ttaattttta  
48961 accatagcac cttcgggtgc tttttttgcg agaagaaaat gccaaagcct attatccaat  
49021 atttccaata tgaacattta cctgaacatt tgcagcaagt tagtaagcca attggtgatt  
49081 tagctcggca aatggatgag caacttcctg acgggcctga aaaatccaca ggattaagaa  
49141 agctacttga agcaaaagat gcatttgtac gccaaagctt aagtaaataa tcatttatag  
49201 aaatgaagcg tcctaaaggg cgctttttta ttgcctgccg aaagcggatg ctaacggcga  
49261 atccgggcgg atgcccattt tgtatatata ggttgatga ccaatgaaac ttaaaacagt  
49321 aacaatcgac ggtaaagttt atgcggaagt agacggtgat aagccgatct atattcatga  
49381 tgacggcaaa gaaatgccac atgatgcacc aactcggta gcaacaattg cacgcttaaa  
49441 caatgaagct aaaacacatc gtgaagccaa agaagcagcc gaaaaagcat taaaagcttt  
49501 tgaaggaatt gaagaccag cggcagctaa aaaggcatta caaacaatcc aaaatctcga  
49561 tgataaaaag ctggtggatg cgggtgaagt tgagaaagtt aaagctgaag ctatcaaagc  
49621 agttgaggaa aaatatgcc cgattgttgc gcaacgtgat gctctagaag cctctttaca  
49681 taaagaactt atcggcgggtg gttttgctcg ttctaagtac attcaagaca acattgcagt  
49741 acctgtggac atggttcagg caacctttgg tcatcacttc aaaatcgaag aaggcaagg  
49801 ggttgcatat gatccgaacg gcgaaaagat ttattcacgt gtccgcccgg gtgaacttgc  
49861 aaatgttgat gaagcttttag agtcattgggt tgggtgatac cagcataaag acttaattct  
49921 taaaggtggt aaaggaactg gtggcggttt tcaagggtgg ggcaaagggt gagcacctac  
49981 tggaatgaaa cgcagtgaaa tgtctgtttc tcagaaagca gattacatca aagaacatgg  
50041 caatgatgcc ttctaaaaac taccgaacta atcattaaat atttgagat aagtagttat  
50101 gactacgaca gttaattcag acatgatcat ctataatcaa ttggctcaaa ctgcttattt

50161 agagcgtttg caagataatt tgaatgtatt taaccaagcc tctaattggtg caattgttta  
50221 tcgcaatgag atcattgaag gtgatttcaa taaagaagca ttctacaaag tgggcggtag  
50281 catcaaaccat cgtgatgtga attcaaccgc caaagtagtt ccagagaaaa ttggttctgg  
50341 tgagtctgta ggcgtaaaag tcccatataa atatggtcct tatgcatcaa ctgaagaggc  
50401 atttaagcgc cgtgctcgta caccagaaga atttgctatg gttgttggtt acgatcttgc  
50461 agatgcattg gttgcaggcc gattagagta cagtttagct tctttaaaag ctgctatttc  
50521 tagcaatcca gacatggttg caaaaggtag tatcgttggt gatggccgca aagcattgac  
50581 tcgtggtatg cgaaagtgtg gtgataagtt tggccgcatt ggcttatggg tgatgaactc  
50641 agatacatat ttcgatattg tcgatgatgc aatcactaag caaatttatg gtgaatctga  
50701 aatcgttatc tacggtggtt taccgggaac cttaggaaaag ccggtcttgg tgacggacgc  
50761 tgtaggtgat aacgatgctt ttggtttgca gtatggcgct gtcactgtaa ctgaatcaca  
50821 agtaccgggc ttccgagctt atgacatcaa tgatgaagaa aacttagcaa tcggtatgcg  
50881 tgctgaaggt gcatttaact tagatattct tggttatagt tgggataca

//

Table S2: Oligonucleotides used in this study

| <b>Primers</b> | <b>Oligonucleotide sequence (5'→3')</b> | <b>Use</b>                     |
|----------------|-----------------------------------------|--------------------------------|
| Phage1_F       | GGTGGTGGGTAGATTAGATG                    | Confirmation of Phage region 1 |
| Phage1_R       | CATCAAGCTCTTTACGCG                      |                                |
| Phage2_F       | GAAACCTTTGGCAGCTTTAC                    | Confirmation of Phage region 2 |
| Phage2_R       | CCACCACATTCAAGTGTTAG                    |                                |
| Phage3_F       | GTAAAATGGCACAAGAATCCC                   | Confirmation of Phage region 3 |
| Phage3_R       | GCTGGTCTGAGGATTAGC                      |                                |
